# Supplementary material for: Synthesis of a monomolecular anionic FLP complex
Source: Royal Society of Chemistry journal article supplement (doi:10.1039/c6cc07081g), 2016-01-01
Supplement: c6cc07081g1.pdf [file c6cc07081g1.pdf]

## Electronic Supplementary Information

### Synthesis of a monomolecular anionic FLP complex

*Andreas Wolfgang Kyri,<sup>[a]</sup> Robert Kunzmann,<sup>[a]</sup> Gregor Schnakenburg,<sup>[a]</sup> Z.-W. Qu,<sup>[b]</sup> S. Grimme<sup>[b]\*</sup> and Rainer Streube<sup>[a]\*</sup>*

<sup>a</sup> Institut für Anorganische Chemie, Rheinische Friedrich-Wilhelms-Universität Bonn, Germany

<sup>b</sup> Mulliken Center of the Rheinische Friedrich-Wilhelms-Universität Bonn, Germany

### Table of Contents

|                                                                   |            |
|-------------------------------------------------------------------|------------|
| <b>Experimental section</b>                                       | <b>S 2</b> |
| <b>Crystal data and summary of data collection and refinement</b> | <b>S 5</b> |
| <b>DFT calculations</b>                                           | <b>S 7</b> |

## Experimental section

**General procedures.** All operations were performed under an argon atmosphere, using common Schlenk techniques and dry solvents. Tetrahydrofuran, diethyl ether and *n*-pentane were dried over sodium wire/benzophenone and further purified by subsequent distillation. All NMR spectra were recorded on a Bruker AX-300 spectrometer (300.1 MHz for  $^1\text{H}$ , 96.25 MHz for  $^{11}\text{B}$ , 75.5 MHz for  $^{13}\text{C}$ , 59.6 MHz for  $^{29}\text{Si}$  and 121.5 MHz for  $^{31}\text{P}$ ). The  $^1\text{H}$  and  $^{13}\text{C}$  NMR spectra were referenced to the residual proton resonances and the  $^{13}\text{C}$  NMR signals of the deuterated solvents,  $^{11}\text{B}$  to 15%  $\text{BF}_3\cdot\text{OEt}_2$  in  $\text{CDCl}_3$  and  $^{31}\text{P}$  to 85%  $\text{H}_3\text{PO}_4$  as external standard, respectively. Melting points were determined in one-side melted off capillaries using a Büchi Type S or a Carl Roth Type MPM-2 apparatus, which are uncorrected. Elemental analyses were carried out on a Vario EL gas chromatograph. Mass spectrometric data were collected on a Kratos MS 50 spectrometer using EI, 70 eV. IR spectra of all compounds were recorded on a Thermo IR spectrometer with an attenuated total reflection (ATR) attachment. The X-ray analyses were performed on a Bruker APEX-II CCD, Bruker X8-KappaApexII or Bruker D8-Venture type diffractometer at 100 or 123 K. The structures were solved by direct methods refined by full-matrix least-squares technique in anisotropic approximation for non-hydrogen atoms using SHELXS97 and SHELXL97<sup>[1]</sup> program packages. Hydrogen atoms were located from Fourier synthesis and refined isotropically. Crystallographic data for the structures reported in this paper have been deposited with the Cambridge Crystallographic Data Centre as supplementary publication no. CCDC-1497789 (**3a**), CCDC-1470387 (**6**) which can be obtained free of charge via [www.ccdc.cam.ac.uk/data\\_request/cif](http://www.ccdc.cam.ac.uk/data_request/cif).

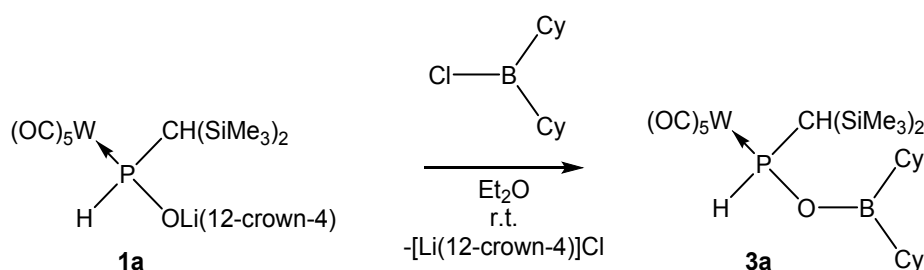

**Preparation of 3a.** In a Schlenk tube, 714.48 mg (1.0 mmol) of complex **1a** were dissolved in 5 mL of diethyl ether, and 1.0 mL (1.0 mmol, 1.0 M in *n*-hexane) of dicyclohexylchloroborane was added. After 5 hours the reaction was completed (checked by  $^{31}\text{P}$  NMR), all volatiles were removed in vacuo ( $\sim 2 \cdot 10^{-2}$  mbar). The crude mixture was extracted four times with 2 mL of *n*-pentane and the solvent was removed *in vacuo* ( $\sim 2 \cdot 10^{-2}$  mbar) to yield **3a** as white powder.

**Complex 3a:** Yield: (0.525 g, 0.743 mmol, 74 %).  $^1\text{H}$  NMR (300.1 MHz,  $\text{C}_6\text{D}_6$ , 25 °C, ppm):  $\delta$  = 0.07 (s, 9 H,  $\text{Si}(\text{CH}_3)_3$ ), 0.31 (s, 9 H,  $\text{Si}(\text{CH}_3)_3$ ), 1.05 (dd, 1 H,  $^2J_{\text{P,H}} = 2.9$  Hz,  $^3J_{\text{H,H}} = 2.9$  Hz CH), 1.09 – 1.84 (m, 22 H,  $\text{CH}_2$ ), 8.35 (dd, 1 H,  $^1J_{\text{P,H}} = 330.9$  Hz,  $^3J_{\text{H,H}} = 2.9$  Hz, PH);  $^{11}\text{B}\{^1\text{H}\}$  NMR (96.25 MHz,  $\text{C}_6\text{D}_6$ , 25 °C):  $\delta$  = 52.2 (s).  $^{13}\text{C}\{^1\text{H}\}$  NMR (75.5 MHz,  $\text{C}_6\text{D}_6$ , 25 °C, ppm):  $\delta$  = 0.4 (d,  $^3J_{\text{P,C}} = 2.9$  Hz,  $\text{Si}(\text{CH}_3)_3$ ), 2.6 (d,  $^3J_{\text{P,C}} = 2.9$  Hz,  $\text{Si}(\text{CH}_3)_3$ ), 25.8 (d,  $^1J_{\text{P,C}} = 10.3$  Hz, P-C), 27.1 – 28.6 (10x  $\text{CH}_2$ ), 30.8 (s, B-CH), 197.4 ( $d_{\text{sat}}$ ,  $^1J_{\text{W,P}} = 125.8$  Hz,  $^2J_{\text{P,C}} = 7.8$  Hz, *cis*-CO), 199.3 (d,  $^2J_{\text{P,C}} = 26.5$  Hz, *trans*-CO);  $^{29}\text{Si}$  (59.6 MHz,  $\text{C}_6\text{D}_6$ , 25°C, ppm)  $\delta$  = 0.0 (d,  $^2J_{\text{P,Si}} = 6.1$  Hz,  $\text{Si}(\text{CH}_3)_3$ ),

1.4 (d,  $^2J_{P,Si} = 7.6$  Hz,  $Si(CH_3)_3$ );  $^{31}P$  NMR (121.5 MHz,  $CDCl_3$ , 25 °C, ppm):  $\delta = 81.5$  ( $d_{sat}$ ,  $^1J_{W,P} = 277.9$  Hz,  $^1J_{P,H} = 330.9$  Hz); IR (ATR,  $\tilde{\nu}$  [ $cm^{-1}$ ]):  $\tilde{\nu} = 2311$  (w,  $\nu(PH)$ ), 2070 (m,  $\nu(CO)$ ), 1982 (w,  $\nu(CO)$ ), 1933 (vs,  $\nu(CO)$ ), 1911 (vs,  $\nu(CO)$ ). MS (EI, 60 eV,  $m/z$  (%)): 708.1 (26)  $[M]^+$ , 680.1 (22)  $[M-1 CO]^+$ ; EA [%]: calculated: C: 40.69, H: 5.98, found: C: 40.09, H: 5.96; Melting Point: 96 °C.

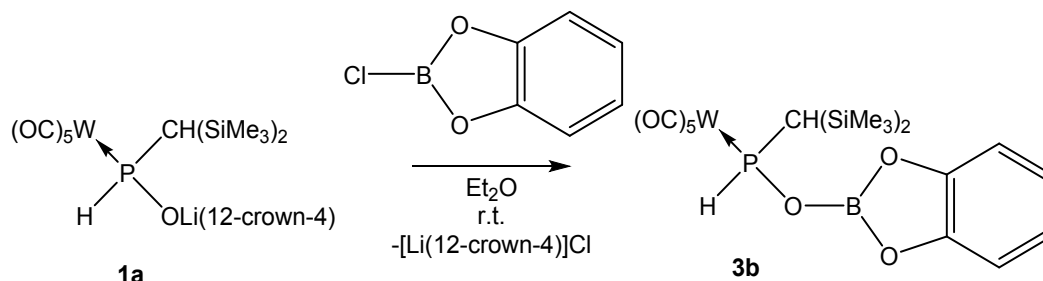

**Preparation of 3b.** In a Schlenk tube, 357.2 mg (0.5 mmol) of complex **1a** were dissolved in 2 mL of diethyl ether and a solution of 77,18 mg (0.5 mmol) catecholchloroborane in 2 mL diethyl ether was added. After 5 hours the reaction was completed (checked by  $^{31}P$  NMR), all volatiles were removed in vacuo ( $\sim 2 \cdot 10^{-2}$  mbar). The crude mixture was extracted four times with 1 mL of *n*-pentane and the solvent was removed *in vacuo* ( $\sim 2 \cdot 10^{-2}$  mbar) to yield **3b** as white powder.

**Complex 3b:** Yield: (0.255 g, 0.39 mmol, 78 %).  $^1H$  NMR (300.1 MHz,  $C_6D_6$ , 25 °C, ppm):  $\delta = -0.03$  (s, 9 H, Si- $CH_3$ ), 0.28 (s, 9 H, Si- $CH_3$ ), 0.98 (dd, 1 H,  $^2J_{P,H} = 3.2$  Hz,  $^3J_{H,H} = 2.3$  Hz CH), 6.66 – 6.72 (m, 2 H, Ar- $H$ ), 6.87 – 6.94 (m, 2 H, Ar- $H$ ), 8.46 (dd, 1 H,  $^1J_{P,H} = 341.8$  Hz,  $^3J_{H,H} = 2.3$  Hz, PH).  $^{11}B\{^1H\}$  NMR (96.25 MHz,  $C_6D_6$ , 25 °C, ppm):  $\delta = 21.7$  (s);  $^{13}C\{^1H\}$  NMR (75.5 MHz,  $C_6D_6$ , 25 °C, ppm):  $\delta = 0.0$  (d,  $^3J_{P,C} = 2.9$  Hz,  $Si(CH_3)_3$ ), 2.2 (d,  $^3J_{P,C} = 3.2$  Hz,  $Si(CH_3)_3$ ), 25.2 (d,  $^1J_{P,C} = 11.0$  Hz, P-C), 112.7 (s, Ph-CH), 123.3 (s, Ph-CH), 148.0 (s, Ph-C), 196.6 ( $d_{sat}$ ,  $^1J_{W,C} = 126.1$  Hz,  $^2J_{P,C} = 7.4$  Hz, *cis*-CO), 199.2 (d,  $^2J_{P,C} = 27.8$  Hz, *trans*-CO);  $^{29}Si$  (59.6 MHz,  $C_6D_6$ , 25 °C, ppm)  $\delta = 1.0$  (d,  $^2J_{P,Si} = 6.1$  Hz,  $Si(CH_3)_3$ ), 1.9 (d,  $^2J_{P,Si} = 8.7$  Hz,  $Si(CH_3)_3$ );  $^{31}P$  NMR (121.5 MHz,  $C_6D_6$ , 25 °C, ppm):  $\delta = 97.7$  (d,  $^1J_{P,H} = 331.6$  Hz,  $^1J_{W,P} = 277.1$  Hz); IR (ATR,  $\tilde{\nu}$  [ $cm^{-1}$ ]):  $\tilde{\nu} = 2300$  (w,  $\nu(PH)$ ), 2075 (m,  $\nu(CO)$ ), 1986 (w,  $\nu(CO)$ ), 1944 (w,  $\nu(CO)$ ), 1912 (vs,  $\nu(CO)$ ); MS (EI, 60 eV,  $m/z$  (%)): 650.0 (15)  $[M]^+$ , 622.0 (5)  $[M-1 CO]^+$ , 594.0 (55)  $[M-2 CO]^+$ , 73.1 (100)  $[SiMe_3]^+$ ; EA [%]: calculated: C: 33.25, H: 3.72, found: C: 33.49, H: 3.97; Melting Point: 114 °C.

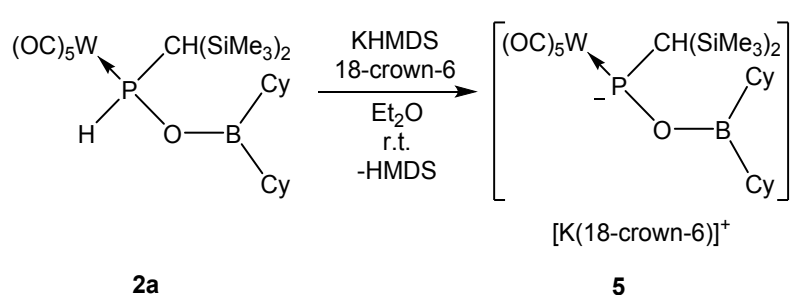

**Preparation of 5.** In a Schlenk tube, 141.3 mg (0.2 mmol) of complex **3a** were dissolved in 5 mL of diethyl ether, and a solution of 39.9 mg (0.2 mmol) KHMDS and 52.86 mg (0.2 mmol) 18-crown-6 in 10 mL diethyl ether was added dropwise. The volatiles were

removed 20 Minutes after finishing the addition of the KHMDS solution. The crude mixture was washed four times with 2 mL of *n*-pentane and the solvent was removed *in vacuo* ( $\sim 2 \cdot 10^{-2}$  mbar) to yield **5** as an orange powder.

**Complex 5:** Yield: (0.149 g, 0.15 mmol, 75 %).  $^1\text{H}$  NMR (300.1 MHz, THF- $d_8$ , 25 °C, ppm):  $\delta = 0.07$  (d, 9 H,  $^3J_{\text{P,C}} = 1.6$  Hz, Si(CH $_3$ ) $_3$ ), 0.19 (s, 9 H, Si(CH $_3$ ) $_3$ ), 2.09 (s, 1 H, P-CH), 1.18 – 1.68 (m, 22 H, CH $_2$ );  $^{11}\text{B}\{^1\text{H}\}$  NMR (96.25 MHz, C $_6\text{D}_6$ , 25 °C, ppm):  $\delta = 51.7$  (s);  $^{13}\text{C}\{^1\text{H}\}$  NMR (75.5 MHz, THF- $d_8$ , 25 °C):  $\delta = 1.1$  (d,  $^3J_{\text{P,C}} = 13.6$  Hz, Si(CH $_3$ ) $_3$ ), 4.2 (s, Si(CH $_3$ ) $_3$ ), 25.2 (d,  $^1J_{\text{P,C}} = 73.3$  Hz, P-C), 28.2 – 28.9 (10x CH $_2$ ), 31.8 (s, B-CH), 207.2 (d $_{\text{sat}}$ ,  $^1J_{\text{W,P}} = 127.8$  Hz,  $^2J_{\text{P,C}} = 5.6$  Hz, *cis*-CO), 210.9 (d,  $^1J_{\text{W,P}} = 153.6$  Hz,  $^2J_{\text{P,C}} = 15.1$  Hz, *trans*-CO);  $^{29}\text{Si}$  (59.6 MHz, THF- $d_8$ , 25 °C, ppm)  $\delta = -5.9$  (d,  $^2J_{\text{P,Si}} = 32.2$  Hz, Si(CH $_3$ ) $_3$ ), -2.0 (d, Si(CH $_3$ ) $_3$ );  $^{31}\text{P}$  NMR (121.5 MHz, THF- $d_8$ , 25 °C, ppm):  $\delta = 190.2$  (s $_{\text{sat}}$ ,  $^1J_{\text{W,P}} = 71.8$  Hz); IR (ATR,  $\tilde{\nu}$  [cm $^{-1}$ ]):  $\tilde{\nu} = 2028$  (m,  $\nu(\text{CO})$ ), 1929 (w,  $\nu(\text{CO})$ ), 1901 (s,  $\nu(\text{CO})$ ), 1873 (vs,  $\nu(\text{CO})$ ), 1844 (vs,  $\nu(\text{CO})$ ); MS (ESI, negative, m/z (%)): 707.2 (50) [M] $^+$ , 678.9 (12) [M - 1 CO] $^-$ , 623.1 (55) [M - 3 CO] $^-$ , (ESI, positive, m/z (%)): 303.1 (100) [M] $^{*+}$ ; Melting Point: 85 °C.

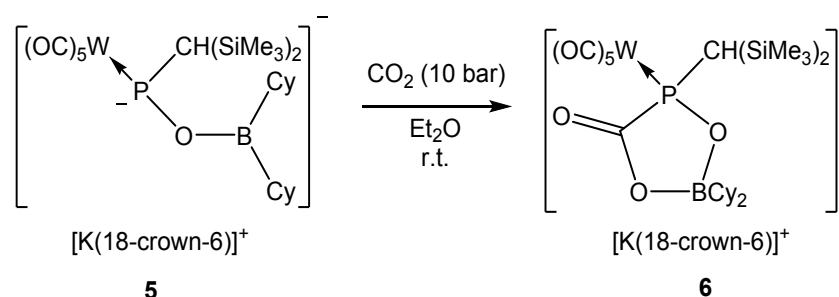

**Preparation of 6.** In a Schlenk tube, 112.5 mg (0.11 mmol) of complex **5** were dissolved in 7 mL of diethyl ether. This solution was stirred for 18 hours under 1 bar of CO $_2$  atmosphere. After the removal of all volatiles, the crude mixture was washed four times with 1 mL of *n*-pentane and the solvent was removed *in vacuo* ( $\sim 2 \cdot 10^{-2}$  mbar) to yield **6** as a white powder.

**Complex 6:** Yield: (0.071 g, 0.067 mmol, 61 %).  $^1\text{H}$  NMR (300.1 MHz, THF- $d_8$ , 25 °C, ppm):  $\delta = 0.25$  (s, 9 H, Si(CH $_3$ ) $_3$ ), 0.36 (s, 9 H, Si(CH $_3$ ) $_3$ ), 1.01 – 1.66 (m, 22 H, CH $_2$ ), 1.27 (d, 1 H,  $^2J_{\text{P,H}} = 2.4$  Hz, P-CH), 3.62 (s, 24 H, crown-CH $_2$ ).  $^{11}\text{B}\{^1\text{H}\}$  NMR (96.25 MHz, THF- $d_8$ , 25 °C, ppm):  $\delta = 13.7$  (s);  $^{13}\text{C}\{^1\text{H}\}$  NMR (75.5 MHz, THF- $d_8$ , 25 °C, ppm):  $\delta = 3.0$  (d,  $^3J_{\text{P,C}} = 1.6$  Hz, Si(CH $_3$ ) $_3$ ), 3.1 (d,  $^3J_{\text{P,C}} = 2.8$  Hz, Si(CH $_3$ ) $_3$ ), 29.0 – 31.5 (10x CH $_2$ ), 34.6 (d,  $^2J_{\text{P,C}} = 6.0$  Hz, P-CH), 37.2 (d,  $^1J_{\text{P,C}} = 118.5$  Hz, CH-Cy), 71.1 (s, crown), 183.6 (d,  $^1J_{\text{P,C}} = 42.4$  Hz, P-CO), 199.7 (d $_{\text{sat}}$ ,  $^1J_{\text{W,P}} = 126.4$  Hz,  $^2J_{\text{P,C}} = 8.3$  Hz, *cis*-CO), 202.9 (d,  $^2J_{\text{P,C}} = 21.8$  Hz,  $^1J_{\text{W,P}} = 140.8$  Hz, *trans*-CO);  $^{29}\text{Si}$  (59.6 MHz, THF- $d_8$ , 25 °C, ppm)  $\delta = -2.4$  (d,  $^2J_{\text{P,Si}} = 11.2$  Hz, Si(CH $_3$ ) $_3$ ), -0.6 (d,  $^2J_{\text{P,Si}} = 5.9$  Hz, Si(CH $_3$ ) $_3$ ).  $^{31}\text{P}$  NMR (121.5 MHz, THF- $d_8$ , 25 °C, ppm):  $\delta = 89.6$  (d $_{\text{sat}}$ ,  $^1J_{\text{W,P}} = 272.6$  Hz,  $^2J_{\text{P,H}} = 2.4$  Hz); IR (ATR,  $\tilde{\nu}$  [cm $^{-1}$ ]):  $\tilde{\nu} = 2064$  (m,  $\nu(\text{CO})$ ), 1973 (w,  $\nu(\text{CO})$ ), 1921 (s,  $\nu(\text{CO})$ ), 1897 (s,  $\nu(\text{CO})$ ), 1656 (m,  $\nu(\text{CO})$ ); MS (ESI, positive, m/z (%)): 751.2 (100) [M] $^+$ , 707.2 (55) [M - CO $_2$ ] $^+$ ; (ESI, negative, m/z (%)): 303.1 (100) [M] $^{*+}$ ; EA [%]: calculated: C: 42.13, H: 6.21, found: C: 43.28, H: 6.54; Decomposition Point: 163 °C.

## Crystal data and summary of data collection and refinement

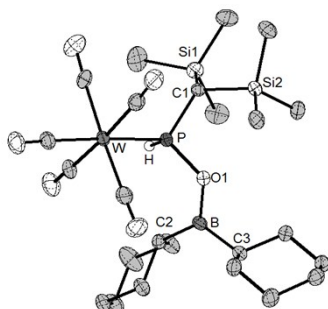

**Crystal Data for 3a:** Suitable single-crystals of **3a** were obtained from a concentrated *n*-pentane solution at -30 °C. Data were collected with a Bruker APEX-II CCD diffractometer equipped with a low-temperature device at 100 K by using graphite monochromated Mo K $\alpha$  radiation ( $\lambda = 0.71073$  Å). The structure was solved by Patterson methods (SHELXS-97)<sup>[1]</sup> and refined by full-matrix least-squares on  $F^2$  (SHELXL-97)<sup>[1]</sup> C<sub>24</sub>H<sub>42</sub>BO<sub>6</sub>PSi<sub>2</sub>W,  $M = 708.38$ , crystal dimensions  $0.18 \times 0.17 \times 0.05$  mm<sup>3</sup>, monoclinic, space group C 2/c,  $Z = 8$ ,  $a = 19.042(6)$  Å,  $b = 9.093(3)$  Å,  $c = 35.451(11)$  Å,  $\alpha = 90.0^\circ$ ,  $\beta = 94.657(5)^\circ$ ,  $\gamma = 90.0^\circ$ ,  $V = 6118.0(3)$  Å<sup>3</sup>,  $d_c = 1.538$  g cm<sup>-3</sup>,  $\mu = 3.940$  mm<sup>-1</sup>,  $T = 100$  K, transmission factors (min./max.) 0.501/ 0.746, empirical absorption correction,  $2\theta_{\text{max}} = 55.998^\circ$ , no. of unique data 7330,  $R_{\text{int}} = 0.0878$ ,  $R_1$  (for  $I > 2\sigma(I)$ ) = 0.0433,  $wR_2$  (for all data) = 0.1087, final  $R = 0.0569$ , goodness of fit 1.023,  $\Delta F(\text{max./min.}) = 1.01/ -2.13$  e Å<sup>-3</sup>.

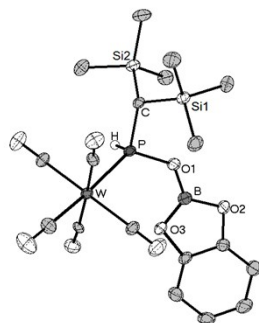

**Crystal Data for 2b:** Suitable single-crystals of **3b** were obtained from a concentrated *n*-pentane solution at -30 °C. Data were collected with a Nonius KappaCCD diffractometer equipped with a low-temperature device at 123 K by using graphite monochromated Mo K $\alpha$  radiation ( $\lambda = 0.71073$  Å). The structure was solved by Patterson methods (SHELXS-97)<sup>[1]</sup> and refined by full-matrix least-squares on  $F^2$  (SHELXL-97)<sup>[1]</sup> C<sub>18</sub>H<sub>24</sub>BO<sub>8</sub>PSi<sub>2</sub>W,  $M = 650.18$ , crystal dimensions  $0.34 \times 0.16 \times 0.1$  mm<sup>3</sup>, triclinic, space group P  $\bar{1}$ ,  $Z = 2$ ,  $a = 8.7638(3)$  Å,  $b = 11.0103(4)$  Å,  $c = 14.5026(6)$  Å,  $\alpha = 108.2413(19)^\circ$ ,  $\beta = 105.4429(17)^\circ$ ,  $\gamma = 91.170(2)^\circ$ ,  $V = 1272.82(8)$  Å<sup>3</sup>,  $d_c = 1.696$  g cm<sup>-3</sup>,  $\mu = 4.733$  mm<sup>-1</sup>,  $T = 123$  K, transmission factors (min./max.) 0.3464/ 0.6657, empirical absorption correction,  $2\theta_{\text{max}} = 56.0^\circ$ , no. of unique data 5900,  $R_{\text{int}} = 0.0610$ ,  $R_1$  (for  $I > 2\sigma(I)$ ) = 0.0329,  $wR_2$  (for all data) = 0.0778, final  $R = 0.0371$ , goodness of fit 1.013,  $\Delta F(\text{max./min.}) = 2.37/ -2.35$  e Å<sup>-3</sup>.

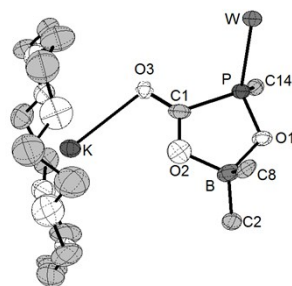

**Crystal Data for 6:** Suitable single-crystals of **6** were obtained from a concentrated *n*-pentane solution at 4 °C. Data were collected with a with a Bruker D8-Venture diffractometer equipped with a low-temperature device at 123 K by using graphite monochromated CuK $\alpha$  radiation ( $\lambda = 1.54178 \text{ \AA}$ ). The structure was solved by Patterson methods (SHELXS-97)<sup>[1]</sup> and refined by full-matrix least-squares on  $F^2$  (SHELXL-97)<sup>[1]</sup> C<sub>79</sub>H<sub>142</sub>B<sub>2</sub>K<sub>2</sub>O<sub>28</sub>P<sub>2</sub>Si<sub>4</sub>W<sub>2</sub>, M = 2181.74, crystal dimensions 0.1  $\times$  0.03  $\times$  0.02 mm<sup>3</sup>, monoclinic, space group P2<sub>1</sub>/c, Z = 2, a = 10.9829(3)  $\text{\AA}$ , b = 19.8205(6)  $\text{\AA}$ , c = 24.0592(8)  $\text{\AA}$ ,  $\alpha = 90^\circ$ ,  $\beta = 96.5137(17)^\circ$ ,  $\gamma = 90^\circ$ , V = 5203.6(3)  $\text{\AA}^3$ ,  $d_c = 1.392 \text{ g cm}^{-3}$ ,  $\mu = 6.028 \text{ mm}^{-1}$ , T = 123 K, transmission factors (min./max.) 0.5693/ 0.7536, empirical absorption correction,  $2\theta_{\text{max}} = 135.49^\circ$ , no. of unique data 9282, Rint = 0.0991, R1 (for I > 2 $\sigma$ (I)) = 0.0560, wR2 (for all data) = 0.1415, final R = 0.0864, goodness of fit 1.029,  $\Delta F(\text{max./min.}) = 1.58/ -1.01 \text{ e \AA}^{-3}$ .

## Literature

- [1] (a) SHELXS-97: G. M. Sheldrick, *Acta Crystallogr., Sect. A:Found. Crystallogr.*, 1990, **46**, 467.  
 (b) Sheldrick, G. M. SHELXL-97; University of Göttingen: Göttingen, Germany, 1997.
- [2] L. Duan, G. Schnakenburg and R. Streubel, *Organometallics*, 2011, **30**, 3246.

### 3. DFT calculations

**Computational Details:** The quantum chemical DFT calculations have been performed with the TURBOMOLE 7.0 suite of programs.<sup>[1]</sup> The structures are fully optimized at the TPSS-D3/def2-TZVP + COSMO (Et<sub>2</sub>O) level of theory, which combines the TPSS functional<sup>[2]</sup> with the BJ-damped D3-dispersion<sup>[3]</sup> and def2-TZVP basis set<sup>[4]</sup> as well as the Conductor-like Screening Model (COSMO) continuum solvation model<sup>[5]</sup> for Et<sub>2</sub>O solvent (dielectric constant  $\epsilon = 4.34$ , refractive constant  $n = 1.352$ , and effective radius  $R_{\text{solv}} = 3.46 \text{ \AA}$ ). The density-fitting RI-J approach<sup>[6]</sup> is used to accelerate the geometry optimization and numerical harmonic frequency calculations in solution. The fully optimized structures are characterized by frequency analysis to identify the nature of located stationary points (no imaginary frequency for true minima and only one imaginary frequency for transition state) and to provide thermal enthalpy and free-energy corrections according to the modified ideal gas–rigid rotor–harmonic oscillator model.<sup>[7]</sup>

The final solvation energies in toluene are computed with the more reliable COSMO-RS solvation model (parameter file: BP\_TZVP\_C30\_1301.ctd) implemented in the COSMOtherm (Version C3.0 Release 14.01) program package<sup>[8]</sup> on the above TPSS-D3 optimized structures. Single-point calculations using the meta-GGA TPSS-D3 functionals are performed using a large def2-QZVP basis set.<sup>[9]</sup> Test calculations using larger diffuse augmented def2-QZVPD basis set<sup>[10]</sup> turn out to have very small effects on reaction energies as compared with those using the def2-QZVP basis set, with the respective mean and standard deviations being only 0.2 and 0.3 kcal/mol, and thus are not discussed further. The final reaction enthalpies ( $\Delta H$ ) and Gibbs free energies ( $\Delta G$ ) are determined from the gas-phase single-point energies plus the corresponding thermal and COSMO-RS solvation corrections. In our discussion, the more reliable PW6B95-D3 final Gibbs free energies (in kcal/mol, at 298.15 K and 1 bar gas and 1 mol/L concentration in solution as standard states) will be used unless specified otherwise.

### References

- [1] TURBOMOLE V7.0 2015, a development of University of Karlsruhe and Forschungszentrum Karlsruhe GmbH, 1989-2007, TURBOMOLE GmbH, since 2007; available from <http://www.turbomole.com>.
- [2] J. Tao, J. P. Perdew, V. N. Staroverov and G. E. Scuseria, *Phys. Rev. Lett.* **2003**, *91*, 146401.
- [3] a) S. Grimme, S. Antony, S. Ehrlich, H. Krieg, D. 132 *J. Chem. Phys.* **2010**, *132*, 154104 ; b) S. Grimme, L. Goerigk, *J. Comput. Chem.* **2011**, *32*, 1456.
- [4] a) A. Schaefer, C. Huber and R. Ahlrichs, *J. Chem. Phys.* **1994**, *100*, 5829-5835; b) F. Weigend, M. Häser, H. Patzelt and R. Ahlrichs, *Chem. Phys. Lett.* **1998**, *143*, 294; c) F. Weigend and R. Ahlrichs, *Phys. Chem. Chem. Phys.* **2005**, *7*, 3297.
- [5] A. Klamt and G. Schüürmann, *J. Chem. Soc., Perkin Trans.* **1993**, *2*, 799.
- [6] a) K. Eichkorn, F. Weigend, O. Treutler and R. Ahlrichs, *Theor. Chem. Acc.* **1997**, *97*, 119; b) P. Deglmann, K. May, F. Furche and R. Ahlrichs, *Chem. Phys. Lett.* **2004**, *384*, 103.
- [7] S. Grimme, *Chem. Eur. J.* **2012**, *18*, 9955.
- [8] a) F. Eckert and A. Klamt, in *COSMOtherm, Version C3.0, Release 14.01*, COSMOlogic GmbH & Co. KG, Leverkusen, Germany, **2013**; b) Eckert, F. and A. Klamt, *AIChE Journal*, **2002**, *48*, 369.
- [9] F. Weigend, F. Furche and R. Ahlrichs, *J. Chem. Phys.* **2003**, *119*, 12753.
- [10] D. Rappoport and F. Furche, *J. Chem. Phys.* **2010**, *133*, 134105.

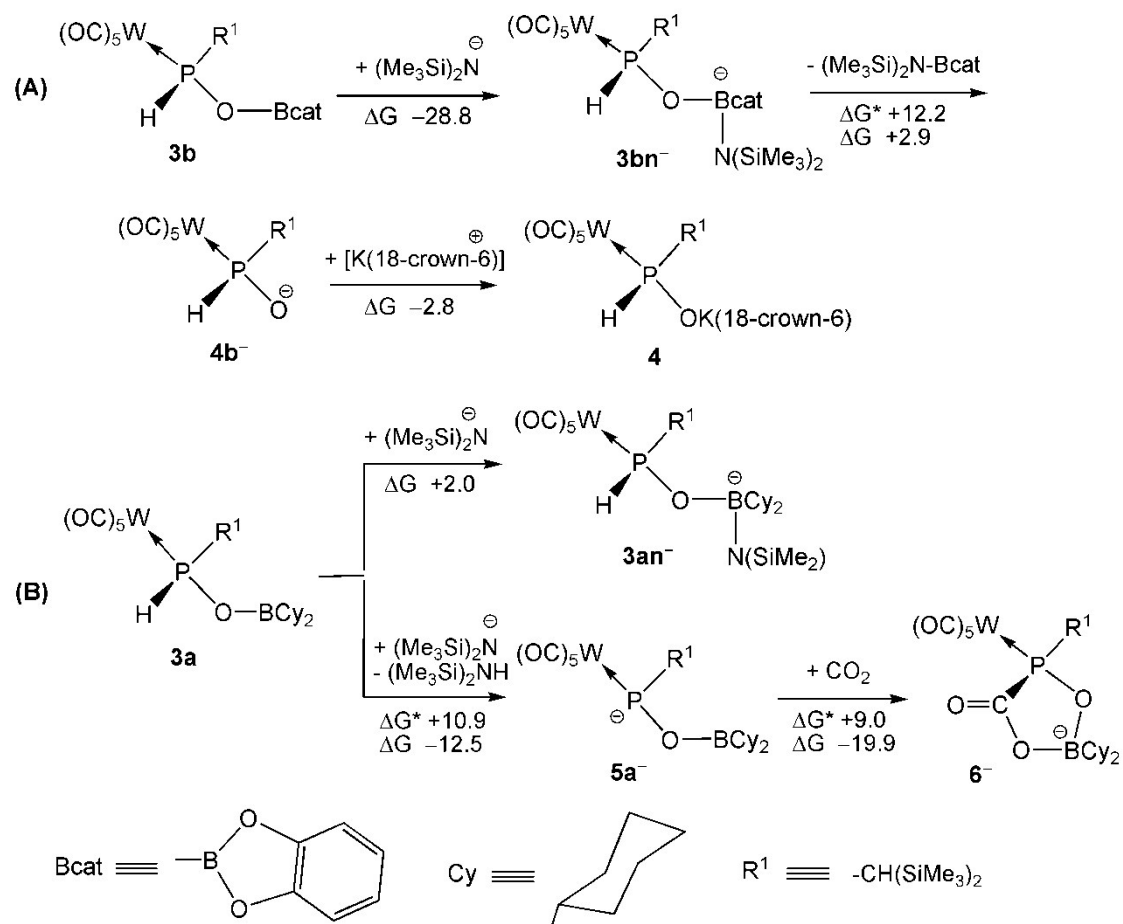

**Figure S1.** Detailed reaction free energy paths (in kcal/mol) at the TPSS-D3 + COSMO-RS (Et<sub>2</sub>O) level of theory.



**Table S1.** The TPSS-D3/def2-TZVP + COSMO (Et<sub>2</sub>O) computed lowest imaginary frequency (ImF), gas-phase enthalpic (Hc) and Gibbs free-energy (Gc) corrections; the COSMO-RS computed solvation enthalpic (Hsol) and Gibbs free-energy (Gsol) corrections in Et<sub>2</sub>O solution; the TPSS-D3 + COSMO total energies (TPSS-D3); the TPSS-D3/def2-QZVP single-point energies (TPSS-D3); the relative electronic energies (Ee), Gibbs free-energies (G) and enthalpies (H) at the TPSS-D3 level. The deviations with respect to TPSS-D3/def2-QZVPD calculations (Diff) are also shown for comparison. Each structure is labeled either by its molecular formula or a specific name in bold, followed by the respective superscript + and – for singly charged cationic and anionic species. Each transition structure (with only one imaginary frequency) is indicated by the "TS" prefix.

| Species                                                              | ImF<br>cm <sup>-1</sup> | Hc<br>kcal/mol | Gc<br>kcal/mol | Hsol<br>kcal/mol | Gsol<br>kcal/mol | COSMO<br>E <sub>h</sub> | TPSS-D3<br>E <sub>h</sub> | Ee<br>kcal/mol | G<br>kcal/mol | H<br>kcal/mol | Diff<br>kcal/mol |
|----------------------------------------------------------------------|-------------------------|----------------|----------------|------------------|------------------|-------------------------|---------------------------|----------------|---------------|---------------|------------------|
| CO <sub>2</sub>                                                      | 0                       | 9.36           | -5.88          | 0.00             | 0.00             | -188.69773              | -188.70543                | --             | --            | --            | --               |
| OEt <sub>2</sub>                                                     | 0                       | 89.19          | 66.09          | -6.69            | -0.23            | -233.79976              | -233.81353                | --             | --            | --            | --               |
| <b>n<sup>-</sup></b> N(SiMe <sub>3</sub> ) <sub>2</sub> <sup>-</sup> | 0                       | 149.87         | 112.68         | -50.73           | -43.19           | -873.67277              | -873.67414                | --             | --            | --            | --               |
| <b>nH</b> HN(SiMe <sub>3</sub> ) <sub>2</sub>                        | 0                       | 158.59         | 122.99         | -9.49            | -2.62            | -874.21870              | -874.26185                | --             | --            | --            | --               |
| <b>na</b> N(SiMe <sub>3</sub> ) <sub>2</sub> BCy <sub>2</sub>        | 0                       | 361.55         | 308.93         | -17.93           | -9.59            | -1369.35397             | -1369.42993               | --             | --            | --            | --               |
| <b>nb</b> N(SiMe <sub>3</sub> ) <sub>2</sub> Bcat                    | 0                       | 214.98         | 170.76         | -15.95           | -7.96            | -1280.34260             | -1280.40440               | --             | --            | --            | --               |
| <b>K<sup>+</sup></b> K(18-crown-6) <sup>+</sup>                      | 0                       | 242.46         | 198.19         | -52.82           | -43.73           | -1523.45245             | -1523.48135               | --             | --            | --            | --               |
| <b>K<sup>+</sup>.OEt<sub>2</sub></b>                                 | 0                       | 332.93         | 276.93         | -51.85           | -42.74           | -1757.27017             | -1757.31715               | --             | --            | --            | --               |
| <b>K<sup>+</sup>.n<sup>-</sup></b>                                   | 0                       | 393.90         | 327.45         | -31.50           | -21.22           | -2397.18206             | -2397.28440               | --             | --            | --            | --               |
| <b>3b</b>                                                            | 0                       | 267.56         | 200.50         | -22.14           | -12.55           | -2315.85567             | -2315.95997               | --             | --            | --            | --               |
| <b>3bn<sup>-</sup></b>                                               | 0                       | 419.65         | 332.52         | -49.92           | -38.92           | -3189.61592             | -3189.73769               | --             | --            | --            | --               |
| <b>TS34<sup>-</sup></b>                                              | -267                    | 418.44         | 332.91         | -50.73           | -39.56           | -3189.59523             | -3189.71792               | --             | --            | --            | --               |
| <b>4b<sup>-</sup></b>                                                | 0                       | 203.45         | 145.30         | -48.13           | -39.35           | -1909.24106             | -1909.28901               | --             | --            | --            | --               |
| <b>4</b>                                                             | 0                       | 447.25         | 359.29         | -34.63           | -23.56           | -3432.74872             | -3432.89489               | --             | --            | --            | --               |
| <b>3a</b>                                                            | 0                       | 415.06         | 339.76         | -23.35           | -13.78           | -2404.89065             | -2405.00901               | --             | --            | --            | --               |
| <b>3an<sup>-</sup></b>                                               | 0                       | 567.16         | 474.48         | -50.23           | -38.93           | -3278.60806             | -3278.74388               | --             | --            | --            | --               |
| <b>3a.n<sup>-</sup></b>                                              | 0                       | 566.81         | 471.18         | -52.22           | -40.64           | -3278.55513             | -3278.72256               | --             | --            | --            | --               |

|                                                        |      |        |        |         |        |             |             |       |       |       |      |
|--------------------------------------------------------|------|--------|--------|---------|--------|-------------|-------------|-------|-------|-------|------|
| <b>TS45<sup>-</sup></b>                                | -698 | 564.46 | 470.36 | -51.43  | -39.94 | -3278.58374 | -3278.72145 | --    | --    | --    | --   |
| <b>5a<sup>-</sup></b>                                  | 0    | 407.37 | 332.00 | -51.98  | -41.64 | -2404.37761 | -2404.46564 | --    | --    | --    | --   |
| <b>5a<sup>-</sup>.HN(SiMe<sub>3</sub>)<sub>2</sub></b> | 0    | 568.37 | 471.76 | -52.69  | -41.05 | -3278.61211 | -3278.74761 | --    | --    | --    | --   |
| <b>5</b>                                               | 0    | 652.29 | 547.43 | -43.09  | -30.75 | -3927.86512 | -3928.04329 | --    | --    | --    | --   |
| <b>5a<sup>-</sup>.CO<sub>2</sub></b>                   | 0    | 417.76 | 336.78 | -52.26  | -41.85 | -2593.08215 | -2593.17903 | --    | --    | --    | --   |
| <b>TS56<sup>-</sup></b>                                | -106 | 417.23 | 338.44 | -52.02  | -41.70 | -2593.07958 | -2593.17632 | --    | --    | --    | --   |
| <b>6a<sup>-</sup></b>                                  | 0    | 418.38 | 340.51 | -54.15  | -43.59 | -2593.12694 | -2593.22252 | --    | --    | --    | --   |
| <b>6</b>                                               | -8   | 661.43 | 556.77 | -43.20  | -30.71 | -4116.63297 | -4116.82128 | --    | --    | --    | --   |
| <b>K<sup>+</sup> + OEt<sub>2</sub></b>                 | 0    | 331.65 | 264.28 | -59.51  | -43.96 | -1757.25221 | -1757.29488 | 0.0   | 0.0   | 0.0   | 0.0  |
| <b>K<sup>+</sup>.OEt<sub>2</sub></b>                   | 0    | 332.93 | 276.93 | -51.85  | -42.74 | -1757.27017 | -1757.31715 | -14.0 | -0.1  | -5.0  | 0.1  |
| <b>K<sup>+</sup> + n<sup>-</sup></b>                   | 0    | 392.33 | 310.87 | -103.55 | -86.91 | -2397.12522 | -2397.15550 | 0.0   | 0.0   | 0.0   | 0.0  |
| <b>K<sup>+</sup>.n<sup>-</sup></b>                     | 0    | 393.90 | 327.45 | -31.50  | -21.22 | -2397.18206 | -2397.28440 | -80.9 | 1.4   | -7.3  | 0.6  |
| <b>K<sup>+</sup> + 4b<sup>-</sup></b>                  | 0    | 445.91 | 343.49 | -100.95 | -83.08 | -3432.69351 | -3432.77037 | 0.0   | 0.0   | 0.0   | 0.0  |
| <b>4</b>                                               | 0    | 447.25 | 359.29 | -34.63  | -23.56 | -3432.74872 | -3432.89489 | -78.1 | -2.8  | -10.5 | 0.1  |
| <b>K<sup>+</sup> + 5a<sup>-</sup></b>                  | 0    | 649.83 | 530.19 | -104.80 | -85.36 | -3927.83006 | -3927.94699 | 0.0   | 0.0   | 0.0   | 0.0  |
| <b>5</b>                                               | 0    | 652.29 | 547.43 | -43.09  | -30.75 | -3927.86512 | -3928.04329 | -60.4 | 11.4  | 3.7   | -0.4 |
| <b>K<sup>+</sup> + 6a<sup>-</sup></b>                  | 0    | 660.84 | 538.71 | -106.97 | -87.32 | -4116.57939 | -4116.70387 | 0.0   | 0.0   | 0.0   | 0.0  |
| <b>6</b>                                               | -8   | 661.43 | 556.77 | -43.20  | -30.71 | -4116.63297 | -4116.82128 | -73.7 | 1.0   | -9.3  | 0.2  |
| <b>3b + n<sup>-</sup></b>                              | 0    | 417.43 | 313.17 | -72.86  | -55.73 | -3189.52844 | -3189.63412 | 0.0   | 0.0   | 0.0   | 0.0  |
| <b>3bn<sup>-</sup></b>                                 | 0    | 419.65 | 332.52 | -49.92  | -38.92 | -3189.61592 | -3189.73769 | -65.0 | -28.8 | -39.8 | 0.5  |
| <b>TS34<sup>-</sup></b>                                | -267 | 418.44 | 332.91 | -50.73  | -39.56 | -3189.59523 | -3189.71792 | -52.6 | -16.7 | -29.4 | 0.5  |
| <b>4a<sup>-</sup> + nb</b>                             | 0    | 418.43 | 316.06 | -64.08  | -47.31 | -3189.58366 | -3189.69341 | -37.2 | -25.9 | -27.4 | 0.5  |

|                                                        |      |        |        |        |        |             |             |       |       |       |      |
|--------------------------------------------------------|------|--------|--------|--------|--------|-------------|-------------|-------|-------|-------|------|
| <b>3a + n<sup>-</sup></b>                              | 0    | 564.94 | 452.43 | -74.08 | -56.96 | -3278.56342 | -3278.68316 | 0.0   | 0.0   | 0.0   | 0.0  |
| <b>3an<sup>-</sup></b>                                 | 0    | 567.16 | 474.48 | -50.23 | -38.93 | -3278.60806 | -3278.74388 | -38.1 | 2.0   | -12.0 | 0.6  |
| <b>4b<sup>-</sup> + na</b>                             | 0    | 565.00 | 454.22 | -66.05 | -48.94 | -3278.59502 | -3278.71894 | -22.5 | -12.6 | -14.4 | 0.5  |
| <b>3a.n<sup>-</sup></b>                                | 0    | 566.81 | 471.18 | -52.22 | -40.64 | -3278.55513 | -3278.72256 | -24.7 | 10.4  | -1.0  | 0.5  |
| <b>TS45<sup>-</sup></b>                                | -698 | 564.46 | 470.36 | -51.43 | -39.94 | -3278.58374 | -3278.72145 | -24.0 | 10.9  | -1.9  | 0.6  |
| <b>5a<sup>-</sup>.HN(SiMe<sub>3</sub>)<sub>2</sub></b> | 0    | 568.37 | 471.76 | -52.69 | -41.05 | -3278.61211 | -3278.74761 | -40.4 | -5.2  | -15.6 | 0.4  |
| <b>5a<sup>-</sup> + nH</b>                             | 0    | 565.96 | 454.99 | -61.48 | -44.25 | -3278.59630 | -3278.72749 | -27.8 | -12.5 | -14.2 | 0.5  |
| <b>5a<sup>-</sup> + CO<sub>2</sub></b>                 | 0    | 416.73 | 326.12 | -51.98 | -41.64 | -2593.07534 | -2593.17106 | 0.0   | -12.5 | 0.0   | 0.0  |
| <b>5a<sup>-</sup>.CO<sub>2</sub></b>                   | 0    | 417.76 | 336.78 | -52.26 | -41.85 | -2593.08215 | -2593.17903 | -5.0  | -7.1  | -4.3  | 0.0  |
| <b>TS56<sup>-</sup></b>                                | -106 | 417.23 | 338.44 | -52.02 | -41.70 | -2593.07958 | -2593.17632 | -3.3  | -3.6  | -2.9  | 0.0  |
| <b>6a<sup>-</sup></b>                                  | 0    | 418.38 | 340.51 | -54.15 | -43.59 | -2593.12694 | -2593.22252 | -32.3 | -32.4 | -32.8 | -0.1 |

**Table S2.** The TPSS-D3/def2-TZVP + COSMO (Et<sub>2</sub>O) optimized atomic Cartesian coordinates (in Å). Each structure is labeled either by its molecular formula or a name in bold (see **Table S1**), followed by the number of atoms, the total energy, and the detailed atomic coordinates (double-column list).

|                             |            |            |            |            |            |            |            |
|-----------------------------|------------|------------|------------|------------|------------|------------|------------|
| <b>3a.n<sup>-</sup>.xyz</b> |            |            | C          | -1.4209334 | 3.1110808  | 1.9863035  |            |
| 104                         |            |            | C          | -0.4325276 | 1.2503729  | 4.2239238  |            |
| Energy = -3278.555125255    |            |            | C          | -3.4148613 | 1.8663086  | 3.8918136  |            |
| B                           | 0.4511976  | -1.6077514 | -0.8865856 | C          | -2.8792348 | -2.9474244 | 1.5847942  |
| O                           | -0.6025252 | -1.2575661 | -0.0525067 | C          | -0.2497253 | -2.1672448 | 3.0679812  |
| C                           | 1.0139091  | -0.6549110 | -2.0148094 | C          | -2.9814157 | -1.6137869 | 4.2652757  |
| C                           | 0.9853005  | -3.1028486 | -0.7441174 | Si         | 0.7521107  | 3.8068933  | -1.2189326 |
| P                           | -1.5123790 | 0.1351109  | 0.0792336  | Si         | 2.2927325  | 2.0947794  | 0.7499615  |
| C                           | 0.3049288  | -1.0522690 | -3.3422041 | O          | -1.8689000 | 1.6933323  | -3.9204559 |
| C                           | 2.5409827  | -0.7732281 | -2.2199930 | O          | -5.9526104 | 0.4053148  | -3.5678741 |
| H                           | 0.7879038  | 0.3996995  | -1.7909496 | O          | -2.8116149 | -2.7407197 | -2.5046143 |
| C                           | -0.0675863 | -4.1231860 | -0.2731438 | O          | -4.3726422 | 3.0521484  | -0.2394006 |
| C                           | 2.2480331  | -3.2109808 | 0.1518255  | O          | -5.5868827 | -1.0155927 | 0.5284392  |
| H                           | 1.3105483  | -3.4048494 | -1.7559309 | H          | 2.6689605  | 0.2720809  | -5.5391340 |
| C                           | -2.1284945 | 0.0587992  | 1.8153873  | H          | 2.5985511  | -1.3911900 | -4.9459857 |
| H                           | -0.4890471 | 1.1655576  | 0.0190570  | H          | 2.1450362  | -6.6687022 | 0.6140523  |
| W                           | -3.4978291 | 0.2487698  | -1.5470013 | H          | 1.4639150  | -5.4293810 | 1.6714416  |
| C                           | 0.8104874  | -0.2414259 | -4.5427053 | H          | -1.2019490 | 3.9332040  | 2.6806204  |
| H                           | -0.7774879 | -0.9219059 | -3.2437599 | H          | -2.2846983 | 3.4093512  | 1.3830048  |
| H                           | 0.4739254  | -2.1227886 | -3.5359803 | H          | -0.5591653 | 2.9906336  | 1.3129568  |
| C                           | 3.0360285  | 0.0615689  | -3.4054186 | H          | -0.3033828 | 2.1539810  | 4.8335658  |
| H                           | 2.8046927  | -1.8274143 | -2.3955882 | H          | -0.6755575 | 0.4254839  | 4.9027986  |
| H                           | 3.0647160  | -0.4599997 | -1.3113843 | H          | 0.5301434  | 1.0338665  | 3.7530716  |
| C                           | 0.4851701  | -5.5538710 | -0.2491842 | H          | -3.3141877 | 2.7609243  | 4.5198726  |
| H                           | -0.9539300 | -4.0748371 | -0.9153496 | H          | -4.2325173 | 2.0540480  | 3.1846387  |
| H                           | -0.3989112 | -3.8511951 | 0.7352606  | H          | -3.7120908 | 1.0352824  | 4.5383489  |
| C                           | 2.8031721  | -4.6418764 | 0.1729042  | H          | -2.5693560 | -2.9136616 | 0.5385615  |
| H                           | 3.0220496  | -2.5174529 | -0.1908084 | H          | -3.9633782 | -2.7973186 | 1.6262723  |
| H                           | 1.9945979  | -2.9108299 | 1.1761911  | H          | -2.6682241 | -3.9547494 | 1.9660322  |
| Si                          | -1.7965898 | 1.5618355  | 2.9581370  | H          | -0.2458578 | -3.2042254 | 3.4281606  |
| Si                          | -2.0064645 | -1.6530704 | 2.6419416  | H          | 0.4121562  | -2.1030497 | 2.2034932  |
| H                           | -3.2181363 | 0.1349267  | 1.6783488  | H          | 0.1707671  | -1.5365253 | 3.8575878  |
| N                           | 0.9981937  | 2.4474719  | -0.2569674 | H          | -4.0225392 | -1.3108474 | 4.1054769  |
| C                           | -2.3845189 | 1.1677179  | -3.0313231 | H          | -2.5444150 | -0.9481810 | 5.0166564  |
| C                           | -5.0571755 | 0.3506325  | -2.8277877 | H          | -2.9947293 | -2.6270876 | 4.6890226  |
| C                           | -3.0376402 | -1.6505823 | -2.1861357 | C          | 1.5109380  | 5.4260102  | -0.5448745 |
| C                           | -4.0111171 | 2.0692486  | -0.7308192 | C          | 1.4551047  | 3.6523467  | -2.9833737 |
| C                           | -4.7894573 | -0.5825480 | -0.1956440 | C          | -1.0956600 | 4.1950750  | -1.4401326 |
| C                           | 2.3304995  | -0.3515282 | -4.7014819 | C          | 2.4452647  | 3.2073673  | 2.2956537  |
| H                           | 0.3020794  | -0.5796649 | -5.4556821 | C          | 2.1312775  | 0.3250300  | 1.4296236  |
| H                           | 0.5426590  | 0.8112991  | -4.4006808 | C          | 4.0201973  | 2.1963306  | -0.0565016 |
| H                           | 2.8349919  | 1.1199560  | -3.2033674 | H          | 2.6033017  | 5.3549867  | -0.4589902 |
| H                           | 4.1239213  | -0.0466250 | -3.5111632 | H          | 1.1166279  | 5.6562510  | 0.4531143  |
| C                           | 1.7392495  | -5.6483205 | 0.6292364  | H          | 1.2854376  | 6.2801189  | -1.1995615 |
| H                           | 0.7397997  | -5.8606831 | -1.2747358 | H          | 1.2763734  | 4.5629210  | -3.5725396 |
| H                           | -0.2834696 | -6.2517043 | 0.1092947  | H          | 0.9955857  | 2.8152655  | -3.5221652 |
| H                           | 3.1423037  | -4.9090038 | -0.8390465 | H          | 2.5383637  | 3.4763743  | -2.9589199 |
| H                           | 3.6825237  | -4.6938665 | 0.8287519  | H          | -1.6712139 | 3.2798157  | -1.6136466 |

|   |            |            |            |
|---|------------|------------|------------|
| H | -1.2719627 | 4.8637195  | -2.2931954 |
| H | -1.5126148 | 4.6756015  | -0.5476045 |
| H | 1.5161725  | 3.2203821  | 2.8772946  |
| H | 2.6606020  | 4.2432400  | 2.0054908  |
| H | 3.2532511  | 2.8723464  | 2.9620051  |
| H | 2.2545736  | -0.4181954 | 0.6333523  |
| H | 1.1397417  | 0.1618365  | 1.8653814  |
| H | 2.8758228  | 0.0986064  | 2.2043967  |
| H | 4.0874595  | 1.5669268  | -0.9514497 |
| H | 4.2354113  | 3.2270578  | -0.3687079 |
| H | 4.8178631  | 1.8873772  | 0.6343054  |

3an<sup>-</sup>.xyz

104

Energy = -3278.608055747

|    |            |            |            |
|----|------------|------------|------------|
| B  | -2.1326488 | 0.2420880  | 0.3400922  |
| P  | 0.8527937  | 0.1984111  | 0.1465109  |
| H  | 0.8358682  | 0.2496606  | 1.5557101  |
| Si | 1.6876583  | 3.1295703  | 1.2471805  |
| Si | 1.4373624  | 2.6497966  | -1.9088268 |
| W  | 2.6080437  | -1.6655228 | -0.3586588 |
| O  | 4.1707038  | -0.0779088 | -2.6655364 |
| O  | 1.3676058  | -3.4704862 | 2.0015757  |
| O  | 4.9186720  | -3.8375960 | -0.5225939 |
| O  | 1.2747207  | -3.3476834 | -2.7536140 |
| O  | 4.4778064  | -0.2049894 | 1.7967768  |
| O  | -0.6524302 | 0.1022187  | -0.2946910 |
| C  | 2.2189474  | 2.3014941  | 2.8594047  |
| C  | -1.4405803 | -1.1799982 | 2.4635477  |
| C  | -0.7238477 | -0.1131724 | 4.6393608  |
| C  | -1.4315736 | -1.3094186 | 3.9912566  |
| C  | 0.1056718  | 4.1295142  | 1.5054614  |
| C  | 1.6344849  | 1.8624249  | -0.1810497 |
| C  | 0.8695122  | 1.4370283  | -3.2240983 |
| C  | 3.0602515  | 4.3813248  | 0.8831999  |
| C  | 0.2355090  | 4.0977610  | -1.8745553 |
| C  | 3.1236768  | 3.2972792  | -2.4638910 |
| C  | -4.5047454 | 3.4894755  | -0.0619800 |
| C  | -4.7389024 | 3.4330700  | -1.5762267 |
| C  | -3.9907947 | 2.1390121  | 0.4554440  |
| C  | -3.4536726 | 3.0143458  | -2.2995432 |
| C  | 1.7547801  | -2.7992558 | 1.1427559  |
| C  | 4.0655835  | -3.0445733 | -0.4761055 |
| C  | -2.6872613 | 1.6831912  | -0.2246432 |
| C  | -2.9001592 | 1.6918171  | -1.7482117 |
| C  | 1.6617409  | -2.7100591 | -1.8702244 |
| C  | 3.7584590  | -0.7072711 | 1.0371575  |
| C  | -1.4087771 | 1.3542993  | 2.6859243  |
| C  | -1.3878789 | 1.2026168  | 4.2137220  |
| C  | -2.0401769 | 0.1497677  | 1.9691762  |
| C  | 3.5644494  | -0.6112264 | -1.8319405 |
| H  | -0.0643001 | 4.2891980  | 2.5767632  |

|    |            |            |            |
|----|------------|------------|------------|
| H  | 2.2883384  | 3.0708652  | 3.6395863  |
| H  | -2.4688170 | -1.3482829 | 4.3582569  |
| H  | 3.2081251  | 1.8440360  | 2.7514822  |
| H  | -0.7234260 | -0.2071266 | 5.7336554  |
| H  | -1.9968111 | -2.0104116 | 2.0147109  |
| H  | 0.3299397  | -0.1077405 | 4.3209861  |
| H  | -0.4092236 | -1.2879802 | 2.1027636  |
| H  | 2.6920425  | 1.5442064  | -0.2188662 |
| H  | 0.1944672  | 5.1114770  | 1.0276510  |
| H  | -0.1715130 | 1.1434647  | -3.0786490 |
| H  | -0.7814577 | 3.6379628  | 1.1003791  |
| H  | -0.9486060 | -2.2484845 | 4.2950664  |
| H  | 1.4720826  | 0.5239421  | -3.2417570 |
| H  | 0.0394248  | 4.4390104  | -2.8987904 |
| H  | 0.9559799  | 1.9155063  | -4.2084647 |
| H  | 3.1974349  | 5.0176852  | 1.7676128  |
| H  | 4.0198019  | 3.8961199  | 0.6695842  |
| H  | -0.7203479 | 3.8131428  | -1.4258328 |
| H  | 2.8147776  | 5.0384891  | 0.0419547  |
| H  | 3.8503132  | 2.4831552  | -2.5568073 |
| H  | 0.6348449  | 4.9476223  | -1.3102512 |
| H  | 3.5398270  | 4.0467010  | -1.7849102 |
| H  | 3.0204597  | 3.7627663  | -3.4530221 |
| H  | -5.4314157 | 3.7736086  | 0.4566947  |
| H  | -5.0961368 | 4.4016191  | -1.9518993 |
| H  | -3.7606921 | 4.2698096  | 0.1597467  |
| H  | -5.5294264 | 2.6966001  | -1.7860087 |
| H  | -3.8640877 | 2.1811581  | 1.5441108  |
| H  | -2.7061021 | 3.8094785  | -2.1703054 |
| H  | -4.7676598 | 1.3863839  | 0.2631499  |
| H  | -3.6364256 | 2.9287384  | -3.3803691 |
| H  | -1.9226518 | 2.4471582  | 0.0044214  |
| H  | -3.5980779 | 0.8800116  | -1.9985078 |
| H  | -1.9561411 | 2.2650187  | 2.4197245  |
| H  | -1.9567794 | 1.4512414  | -2.2480802 |
| H  | -2.4232110 | 1.2112915  | 4.5872501  |
| H  | -3.0812429 | 0.1485555  | 2.3140645  |
| H  | -0.8738392 | 2.0568618  | 4.6766788  |
| H  | 1.5301725  | 1.5315163  | 3.2169621  |
| H  | -0.3821743 | 1.5160685  | 2.3399122  |
| N  | -2.9829522 | -0.9768240 | -0.2219070 |
| Si | -4.5338441 | -1.4665432 | 0.4020884  |
| Si | -2.3580221 | -2.0624273 | -1.4339651 |
| C  | -4.6069511 | -3.3270823 | 0.8090657  |
| C  | -5.1625963 | -0.7706456 | 2.0557814  |
| C  | -5.9542603 | -1.0524161 | -0.7912459 |
| C  | -3.7184507 | -2.9051866 | -2.4753788 |
| C  | -1.3289083 | -1.3199607 | -2.8254913 |
| C  | -1.3508636 | -3.4395864 | -0.6236629 |
| H  | -3.9544287 | -3.5295417 | 1.6683950  |
| H  | -5.2013363 | 0.3191603  | 2.1228726  |
| H  | -4.3093825 | -4.0036751 | 0.0046844  |

|   |            |            |            |   |            |            |            |
|---|------------|------------|------------|---|------------|------------|------------|
| H | -4.5926788 | -1.1497603 | 2.9105477  | C | 9.3457873  | -0.4179298 | 27.2104752 |
| H | -6.1914774 | -1.1483126 | 2.1529135  | C | 9.2156439  | 1.9586359  | 28.1327533 |
| H | -5.6318655 | -3.5892919 | 1.1061967  | C | 9.8498061  | 1.8222317  | 34.5275489 |
| H | -6.0836730 | 0.0353644  | -0.8559508 | H | 10.3950596 | 5.8573748  | 29.6019271 |
| H | -6.8988347 | -1.4779557 | -0.4254313 | H | 10.6631286 | 8.1334573  | 32.4781307 |
| H | -5.7851156 | -1.4220438 | -1.8058504 | H | 10.4489552 | 1.6207078  | 25.6264020 |
| H | -1.9358653 | -3.9548075 | 0.1456329  | H | 10.5698846 | 6.9625901  | 33.8041303 |
| H | -4.1657077 | -2.1786722 | -3.1657076 | H | 11.0316083 | -0.7818536 | 25.8888885 |
| H | -1.8682853 | -0.5039943 | -3.3178514 | H | 10.8611529 | 3.2306955  | 27.4831861 |
| H | -0.3661216 | -0.9399536 | -2.4887901 | H | 11.4721494 | -0.5118505 | 27.5760023 |
| H | -4.5306645 | -3.3997373 | -1.9383225 | H | 11.3347870 | 1.9075043  | 28.5436059 |
| H | -1.0000463 | -4.1831533 | -1.3492533 | H | 11.2592619 | 4.1346637  | 33.3679340 |
| H | -0.4746816 | -3.0061295 | -0.1312970 | H | 11.4699028 | 7.2585050  | 29.6755973 |
| H | -3.2159173 | -3.6663673 | -3.0893132 | H | 11.2734986 | 0.9814985  | 30.7530269 |
| H | -1.1501656 | -2.1042547 | -3.5728300 | H | 12.1313850 | 5.6487963  | 29.3420022 |

**3a.xyz**

77

Energy = -2404.890649465

|    |            |            |            |
|----|------------|------------|------------|
| B  | 8.7626516  | 2.8018109  | 29.3838653 |
| P  | 9.5396872  | 3.7220725  | 31.8441427 |
| H  | 8.9943574  | 4.9546289  | 31.4128395 |
| Si | 11.6317169 | 5.9595221  | 31.7776691 |
| Si | 12.5772035 | 2.8422043  | 31.8000013 |
| W  | 8.1718687  | 2.6456247  | 33.6692295 |
| O  | 10.7660024 | 1.3781563  | 35.0771863 |
| O  | 5.4328252  | 4.0176967  | 32.6962608 |
| O  | 6.4624912  | 1.3301105  | 36.0202367 |
| O  | 7.7527562  | 0.0899287  | 31.7600238 |
| O  | 8.7220286  | 5.2933241  | 35.4043104 |
| O  | 9.7216809  | 2.9771196  | 30.3810023 |
| C  | 10.4506005 | 7.0850489  | 32.7213636 |
| C  | 10.6806422 | 2.1706954  | 27.7034333 |
| C  | 10.7969497 | -0.1785477 | 26.7743547 |
| C  | 11.0518275 | 1.3077799  | 26.4911940 |
| C  | 11.3856613 | 6.1944112  | 29.9275140 |
| C  | 11.2494625 | 4.1521377  | 32.2672162 |
| C  | 11.8928762 | 1.0948082  | 31.6459732 |
| C  | 13.3824313 | 6.4304579  | 32.2826645 |
| C  | 13.4440846 | 3.2697274  | 30.1862557 |
| C  | 13.8188067 | 2.8710928  | 33.2147687 |
| C  | 4.8372921  | 3.3701768  | 29.0289460 |
| C  | 4.9205708  | 4.6965498  | 28.2629654 |
| C  | 6.1714601  | 2.6130985  | 28.9862143 |
| C  | 6.0672927  | 5.5668212  | 28.7920905 |
| C  | 6.4309386  | 3.5180681  | 32.9981505 |
| C  | 7.0837466  | 1.8091165  | 35.1673137 |
| C  | 7.3428848  | 3.4711030  | 29.5100643 |
| C  | 7.4045294  | 4.8170561  | 28.7296801 |
| C  | 7.8969038  | 0.9987096  | 32.4577995 |
| C  | 8.5165979  | 4.3397871  | 34.7830213 |
| C  | 8.9739321  | 0.4486745  | 28.4213071 |

|   |            |            |            |
|---|------------|------------|------------|
| C | 9.3457873  | -0.4179298 | 27.2104752 |
| C | 9.2156439  | 1.9586359  | 28.1327533 |
| C | 9.8498061  | 1.8222317  | 34.5275489 |
| H | 10.3950596 | 5.8573748  | 29.6019271 |
| H | 10.6631286 | 8.1334573  | 32.4781307 |
| H | 10.4489552 | 1.6207078  | 25.6264020 |
| H | 10.5698846 | 6.9625901  | 33.8041303 |
| H | 11.0316083 | -0.7818536 | 25.8888885 |
| H | 10.8611529 | 3.2306955  | 27.4831861 |
| H | 11.4721494 | -0.5118505 | 27.5760023 |
| H | 11.3347870 | 1.9075043  | 28.5436059 |
| H | 11.2592619 | 4.1346637  | 33.3679340 |
| H | 11.4699028 | 7.2585050  | 29.6755973 |
| H | 11.2734986 | 0.9814985  | 30.7530269 |
| H | 12.1313850 | 5.6487963  | 29.3420022 |
| H | 12.1035116 | 1.4677196  | 26.2218316 |
| H | 11.2980164 | 0.7902587  | 32.5112839 |
| H | 12.7370504 | 3.3473312  | 29.3558273 |
| H | 12.7376174 | 0.3984622  | 31.5662669 |
| H | 13.5548946 | 7.4881753  | 32.0473105 |
| H | 13.5280135 | 6.3035951  | 33.3617060 |
| H | 14.0063544 | 4.2071891  | 30.2455971 |
| H | 14.1500285 | 5.8461657  | 31.7658407 |
| H | 13.3443338 | 2.5749868  | 34.1578470 |
| H | 14.1573161 | 2.4716466  | 29.9440596 |
| H | 14.2610527 | 3.8628022  | 33.3557345 |
| H | 14.6343410 | 2.1649559  | 33.0162333 |
| H | 4.0396948  | 2.7417402  | 28.6139665 |
| H | 3.9698950  | 5.2382567  | 28.3363439 |
| H | 4.5723117  | 3.5746854  | 30.0747378 |
| H | 5.0895722  | 4.4895702  | 27.1961416 |
| H | 6.0941919  | 1.6903049  | 29.5735105 |
| H | 5.8616688  | 5.8443999  | 29.8353505 |
| H | 6.3817086  | 2.3114522  | 27.9506229 |
| H | 6.1369158  | 6.4988593  | 28.2176784 |
| H | 7.1266431  | 3.7252648  | 30.5585901 |
| H | 7.6590916  | 4.6133091  | 27.6798709 |
| H | 7.9289197  | 0.2737629  | 28.7002691 |
| H | 8.2062949  | 5.4510836  | 29.1308051 |
| H | 8.6714736  | -0.1741747 | 26.3770481 |
| H | 8.5680408  | 2.2219708  | 27.2807345 |
| H | 9.1902760  | -1.4774456 | 27.4495264 |
| H | 9.3979308  | 6.9005374  | 32.4792418 |
| H | 9.5844505  | 0.1478954  | 29.2838394 |

**3bn-.xyz**

82

Energy = -3189.582826046

|    |            |            |            |
|----|------------|------------|------------|
| B  | -1.1662299 | -0.5273552 | -0.2608546 |
| P  | 1.5141753  | 0.1120724  | 0.2222473  |
| H  | 1.0014579  | 0.1392146  | 1.5422611  |
| Si | 1.6492929  | 2.9712577  | 1.4522643  |

|    |            |            |            |                          |            |            |            |
|----|------------|------------|------------|--------------------------|------------|------------|------------|
| Si | 1.5759256  | 2.4935632  | -1.7718442 | Si                       | -1.2673258 | -3.1459454 | -1.2167664 |
| W  | 3.4627715  | -1.5384761 | 0.0111235  | Si                       | -1.7931932 | -2.3875037 | 1.6953608  |
| O  | 5.2404877  | 0.6449224  | -1.5287653 | C                        | -0.0982813 | -4.6151753 | -0.9911457 |
| O  | 1.8537636  | -3.7283675 | 1.7344151  | C                        | -3.0234845 | -3.8279332 | -1.4283331 |
| O  | 5.8975035  | -3.5880663 | -0.1204761 | C                        | -0.8016556 | -2.3633615 | -2.8668641 |
| O  | 2.5771936  | -2.6420159 | -2.8793708 | C                        | -1.6752132 | -4.2490239 | 2.0369279  |
| O  | 4.6785695  | -0.4592585 | 2.7784809  | C                        | -0.7944275 | -1.5855336 | 3.0858892  |
| O  | 0.2077232  | -0.0476369 | -0.6720372 | C                        | -3.6214134 | -1.9601314 | 1.9251449  |
| C  | 2.6013520  | 2.3207043  | 2.9468870  | H                        | -0.2266239 | -5.3058702 | -1.8357618 |
| C  | -0.1716142 | 3.0262773  | 1.8853202  | H                        | -3.0782611 | -4.5096374 | -2.2879028 |
| C  | 2.0406272  | 1.8558218  | -0.0330295 | H                        | 0.9464505  | -4.2878968 | -0.9934824 |
| C  | 1.7198213  | 1.1639131  | -3.0972057 | H                        | -3.7166125 | -2.9976526 | -1.6101364 |
| C  | 2.2527954  | 4.7370530  | 1.1393203  | H                        | -3.3811870 | -4.3741326 | -0.5479908 |
| C  | -0.1439650 | 3.2475495  | -1.8043563 | H                        | -0.2691746 | -5.1769182 | -0.0692435 |
| C  | 2.8578416  | 3.8116187  | -2.2260373 | H                        | 0.0534708  | -1.6902302 | -2.7736507 |
| C  | 2.3786192  | -2.9315405 | 1.0831791  | H                        | -1.6326463 | -1.7834180 | -3.2761869 |
| C  | 5.0076341  | -2.8396292 | -0.0788772 | H                        | -0.5319867 | -3.1532261 | -3.5799819 |
| C  | 2.8336370  | -2.2418149 | -1.8266310 | H                        | -4.2341565 | -2.4941124 | 1.1883622  |
| C  | 4.2084288  | -0.8322244 | 1.7863887  | H                        | -0.6379663 | -4.5958227 | 2.0738388  |
| C  | 4.5835118  | -0.1397841 | -0.9806348 | H                        | 0.2613346  | -1.8728657 | 3.0346990  |
| H  | -0.5617739 | 2.0242702  | 2.0861228  | H                        | -0.8611249 | -0.4951318 | 3.0546296  |
| H  | 2.4259482  | 2.9678776  | 3.8159608  | H                        | -2.2163115 | -4.8651265 | 1.3109570  |
| H  | 3.6813760  | 2.2910916  | 2.7634869  | H                        | -3.9653672 | -2.2614171 | 2.9242954  |
| H  | 3.1402235  | 1.8185573  | -0.0570078 | H                        | -3.8167837 | -0.8903252 | 1.8060696  |
| H  | -0.3131325 | 3.6404335  | 2.7844034  | H                        | -2.1231426 | -4.4386467 | 3.0222839  |
| H  | 0.9254609  | 0.4203294  | -3.0068850 | H                        | -1.1801471 | -1.9263187 | 4.0566730  |
| H  | -0.7837355 | 3.4525624  | 1.0851278  |                          |            |            |            |
| H  | 2.6843634  | 0.6464652  | -3.0517757 | <b>3b.xyz</b>            |            |            |            |
| H  | -0.9000470 | 2.5251532  | -1.4835753 | 55                       |            |            |            |
| H  | 1.6457696  | 1.6344562  | -4.0866836 | Energy = -2315.855674923 |            |            |            |
| H  | 2.1401039  | 5.3268876  | 2.0585117  | B                        | 1.9738296  | -1.4524350 | -0.1060406 |
| H  | 3.3098528  | 4.7675895  | 0.8510502  | P                        | -0.4776740 | -0.5911356 | 0.7035145  |
| H  | -0.2184251 | 4.1289607  | -1.1570219 | H                        | -0.2571849 | -0.9675167 | 2.0493590  |
| H  | 1.6735785  | 5.2360170  | 0.3544828  | Si                       | -2.5499580 | -2.6264352 | 1.6630621  |
| H  | 3.8705121  | 3.3908389  | -2.1955682 | Si                       | -2.0321834 | -2.1349775 | -1.5263526 |
| H  | -0.3967893 | 3.5639381  | -2.8244132 | W                        | -0.2942756 | 1.8807124  | 0.3556865  |
| H  | 2.8351041  | 4.6838704  | -1.5660702 | O                        | -2.8530770 | 1.8640417  | -1.5851885 |
| H  | 2.6782459  | 4.1631007  | -3.2505085 | O                        | 2.1697521  | 2.0351433  | 2.4218183  |
| H  | 2.2864787  | 1.3084572  | 3.2230380  | O                        | -0.1286777 | 5.0527551  | 0.0265352  |
| C  | -2.6906289 | 1.0762691  | 0.3997982  | O                        | 1.7346695  | 1.3986765  | -2.0956768 |
| C  | -3.4607977 | 2.0048093  | 1.0825062  | O                        | -2.3039531 | 2.1802243  | 2.8462979  |
| C  | -2.9227114 | 0.7881994  | -0.9591906 | O                        | 0.6284293  | -1.6146826 | -0.0050360 |
| C  | -4.4819288 | 2.6623061  | 0.3706054  | C                        | -2.9356280 | -1.5741132 | 3.1773138  |
| H  | -3.2764520 | 2.2151624  | 2.1317043  | C                        | -1.1590512 | -3.8296597 | 2.0571141  |
| C  | -3.9285582 | 1.4359152  | -1.6635554 | C                        | -2.0150690 | -1.4336044 | 0.2656326  |
| C  | -4.7084905 | 2.3840462  | -0.9764711 | C                        | -1.0042478 | -1.1156178 | -2.7306592 |
| H  | -5.0992880 | 3.3962255  | 0.8821453  | C                        | -4.1072932 | -3.5685423 | 1.1885187  |
| H  | -4.0997446 | 1.2127678  | -2.7127963 | C                        | -1.4009437 | -3.9048290 | -1.5717950 |
| H  | -5.5025679 | 2.9033310  | -1.5072535 | C                        | -3.8250002 | -2.0471062 | -2.0914403 |
| O  | -1.6654281 | 0.3277765  | 0.8805089  | C                        | 1.2981081  | 1.9536797  | 1.6700061  |
| O  | -2.0660529 | -0.1513538 | -1.4109631 | C                        | -0.1879279 | 3.9021903  | 0.1437564  |
| N  | -1.1965586 | -2.0007533 | 0.1008340  | C                        | 1.0011614  | 1.5889838  | -1.2237662 |

|   |            |            |            |
|---|------------|------------|------------|
| C | -1.5795445 | 2.0798647  | 1.9508201  |
| C | -1.9197920 | 1.8564537  | -0.9011279 |
| H | -0.2286933 | -3.3146475 | 2.3215600  |
| H | -3.2781001 | -2.2098295 | 4.0029411  |
| H | -3.7296804 | -0.8496324 | 2.9607103  |
| H | -2.7693856 | -0.6323608 | 0.2413646  |
| H | -1.4466518 | -4.4493636 | 2.9153203  |
| H | 0.0686640  | -1.1895864 | -2.5346362 |
| H | -0.9445856 | -4.4966319 | 1.2166265  |
| H | -1.2822128 | -0.0579722 | -2.7367239 |
| H | -0.3687965 | -3.9626812 | -1.2110942 |
| H | -1.1834881 | -1.5049894 | -3.7414209 |
| H | -4.4243690 | -4.1886387 | 2.0364134  |
| H | -4.9308078 | -2.8859526 | 0.9500965  |
| H | -2.0130492 | -4.5884029 | -0.9742948 |
| H | -3.9555548 | -4.2323116 | 0.3311576  |
| H | -4.1821836 | -1.0102602 | -2.0851574 |
| H | -1.4166372 | -4.2665016 | -2.6075646 |
| H | -4.4954703 | -2.6396828 | -1.4615787 |
| H | -3.9103049 | -2.4222582 | -3.1186837 |
| H | -2.0633132 | -1.0153191 | 3.5349504  |
| C | 4.0387065  | -0.7346317 | 0.1722916  |
| C | 5.1896622  | -0.0788615 | 0.5655125  |
| C | 4.0388706  | -1.7141544 | -0.8217485 |
| C | 6.3712278  | -0.4552566 | -0.0918947 |
| H | 5.1768448  | 0.6829138  | 1.3374847  |
| C | 5.1954530  | -2.0950474 | -1.4763021 |
| C | 6.3735892  | -1.4386176 | -1.0870131 |
| H | 7.3031070  | 0.0305682  | 0.1799411  |
| H | 5.1900995  | -2.8564311 | -2.2487923 |
| H | 7.3076907  | -1.7017397 | -1.5734927 |
| O | 2.7408682  | -0.5628137 | 0.6465525  |
| O | 2.7422330  | -2.1863450 | -1.0094971 |

**4b-.xyz**

42

Energy = -1909.241059344

|    |            |            |            |
|----|------------|------------|------------|
| P  | -0.3741129 | -0.5490639 | 0.2507517  |
| H  | -0.1010390 | -0.7623146 | 1.6435672  |
| Si | -2.2500574 | -2.5551979 | 1.5967652  |
| Si | -2.3243043 | -2.0555574 | -1.5873753 |
| W  | -0.4479743 | 2.0287062  | -0.0212406 |
| O  | -3.3942048 | 1.8635682  | -1.2856289 |
| O  | 2.4625469  | 1.8401382  | 1.3318508  |
| O  | -0.3664341 | 5.2067526  | -0.2147716 |
| O  | 0.8907454  | 1.6650867  | -2.9238115 |
| O  | -1.7938502 | 2.0805420  | 2.8928881  |
| O  | 0.6286256  | -1.3733007 | -0.5570361 |
| C  | -2.4543482 | -1.5642508 | 3.1925561  |
| C  | -0.7521659 | -3.6916842 | 1.7446763  |
| C  | -2.0457680 | -1.3536094 | 0.1520746  |
| C  | -1.6276249 | -0.9537786 | -2.9475215 |

|   |            |            |            |
|---|------------|------------|------------|
| C | -3.8003818 | -3.6289695 | 1.4324191  |
| C | -1.5428688 | -3.7604379 | -1.7731759 |
| C | -4.1918156 | -2.1720752 | -1.8740942 |
| C | 1.4166716  | 1.9277625  | 0.8375500  |
| C | -0.3991162 | 4.0402416  | -0.1520129 |
| C | 0.4036403  | 1.8004234  | -1.8814794 |
| C | -1.3043285 | 2.0776904  | 1.8393921  |
| C | -2.3221168 | 1.9340068  | -0.8413822 |
| H | 0.1826598  | -3.1359589 | 1.6143210  |
| H | -2.6132345 | -2.2379021 | 4.0445860  |
| H | -3.3191981 | -0.8924455 | 3.1284079  |
| H | -2.8017878 | -0.5656108 | 0.2895627  |
| H | -0.7361747 | -4.1740315 | 2.7303324  |
| H | -0.5430538 | -0.8624684 | -2.8430800 |
| H | -0.7743876 | -4.4785409 | 0.9832246  |
| H | -2.0623609 | 0.0507019  | -2.9317294 |
| H | -0.4760291 | -3.6900078 | -1.5356470 |
| H | -1.8506099 | -1.3986480 | -3.9268087 |
| H | -3.9068373 | -4.2642802 | 2.3217785  |
| H | -4.7062416 | -3.0163580 | 1.3503542  |
| H | -1.9968693 | -4.5070704 | -1.1117349 |
| H | -3.7582070 | -4.2867409 | 0.5572064  |
| H | -4.6556687 | -1.1820482 | -1.7808904 |
| H | -1.6491836 | -4.1187780 | -2.8052290 |
| H | -4.6855310 | -2.8422223 | -1.1625781 |
| H | -4.3999102 | -2.5426903 | -2.8863392 |
| H | -1.5740050 | -0.9496181 | 3.4074360  |

**4.xyz**

85

Energy = -3432.748722469

|    |            |            |            |
|----|------------|------------|------------|
| P  | -0.0417646 | 1.3444988  | 15.8227540 |
| H  | -0.7067087 | 0.4159367  | 14.9566084 |
| Si | -2.5650503 | 0.1118372  | 17.0562304 |
| Si | -1.0011420 | 2.5138587  | 18.5076893 |
| W  | 2.4523954  | 0.6715689  | 15.8588837 |
| O  | 2.4142946  | 0.4407087  | 19.0638746 |
| O  | 2.4553443  | 0.8397600  | 12.6502101 |
| O  | 5.5128516  | -0.2135243 | 15.8001636 |
| O  | 3.1945629  | 3.7887836  | 16.0561065 |
| O  | 1.3577643  | -2.3430649 | 15.6617971 |
| O  | -0.4561620 | 2.7487020  | 15.3562834 |
| C  | -2.2237102 | -1.6152713 | 16.3740528 |
| C  | -3.5601278 | 1.1200649  | 15.8050204 |
| C  | -0.9135466 | 0.9665867  | 17.4129045 |
| C  | 0.5237758  | 3.6140245  | 18.3888463 |
| C  | -3.5997649 | -0.1244622 | 18.6206050 |
| C  | -2.4901756 | 3.5694556  | 18.0373317 |
| C  | -1.1405356 | 1.9503731  | 20.3055230 |
| C  | 2.4398343  | 0.7953617  | 13.8097265 |
| C  | 4.3937799  | 0.1127106  | 15.8261183 |
| C  | 2.9321234  | 2.6605155  | 15.9879614 |



|   |            |            |            |                              |            |            |            |
|---|------------|------------|------------|------------------------------|------------|------------|------------|
| C | 1.7732308  | -1.2628129 | 15.7335087 | H                            | 1.5537634  | 2.5652673  | 10.5856444 |
| C | 2.4261454  | 0.5325720  | 17.9070676 | H                            | 1.9584151  | 5.6054306  | 10.9415451 |
| H | -2.9050487 | 1.7826283  | 15.2300995 | H                            | 3.0962637  | 4.7981748  | 13.6762922 |
| H | -3.1675182 | -2.1482258 | 16.2012401 | H                            | -3.9860940 | 4.0390925  | 11.5909337 |
| H | -1.6288581 | -2.2058500 | 17.0813369 | H                            | -4.6872284 | 2.8347544  | 12.7103839 |
| H | -0.2948012 | 0.2394062  | 17.9594236 | H                            | 3.6975948  | 6.1469567  | 12.6718311 |
| H | -4.0958937 | 0.4646035  | 15.1079112 | H                            | -3.1514614 | 7.9152926  | 16.5572878 |
| H | 0.6380349  | 4.0106823  | 17.3769592 | H                            | 3.1137773  | 4.2736022  | 11.2327075 |
| H | -4.3014649 | 1.7531896  | 16.3054758 | H                            | -3.9196706 | 5.1754840  | 15.9775767 |
| H | 1.4425052  | 3.0826844  | 18.6566020 | H                            | -4.5035779 | 5.9350466  | 13.0602807 |
| H | -2.4271738 | 3.8001187  | 16.9692423 | H                            | -5.4004284 | 4.7262717  | 14.0231829 |
| H | 0.4134657  | 4.4571934  | 19.0840768 | H                            | -4.8340431 | 6.6172007  | 15.4518437 |
| H | -4.5152313 | -0.6792701 | 18.3765231 |                              |            |            |            |
| H | -3.0559653 | -0.6978165 | 19.3807025 |                              |            |            |            |
| H | -3.4453995 | 3.0663761  | 18.2223961 | <b>5a-CO<sub>2</sub>.xyz</b> |            |            |            |
| H | -3.8996989 | 0.8296648  | 19.0679137 | 79                           |            |            |            |
| H | -0.2642515 | 1.3534051  | 20.5872563 | Energy = -2593.082148949     |            |            |            |
| H | -2.4912393 | 4.5097485  | 18.6029953 | B                            | -0.9830273 | -0.6531665 | -0.4910634 |
| H | -2.0328844 | 1.3433221  | 20.4886928 | O                            | 0.0519764  | 0.2183811  | -0.2811044 |
| H | -1.1800556 | 2.8186716  | 20.9758067 | P                            | 1.5531822  | -0.0191153 | 0.5262695  |
| H | -1.6762726 | -1.5841802 | 15.4261456 | C                            | 1.7170490  | -1.6634953 | 3.6763149  |
| K | -0.6610771 | 4.8586550  | 13.9773930 | O                            | 0.8789653  | -1.0687264 | 4.2356666  |
| O | -1.5228887 | 3.2216408  | 11.7089770 | O                            | 2.5662118  | -2.2923246 | 3.1774003  |
| O | -0.0688293 | 7.2353325  | 15.4559693 | Si                           | 1.2641304  | 2.8292173  | -0.9404709 |
| O | 1.7784589  | 6.3924236  | 13.4471139 | Si                           | 1.8583303  | 2.4455310  | 2.1915510  |
| O | 1.2160900  | 4.0057444  | 12.0462472 | W                            | 3.2695555  | -1.4188649 | -0.9402011 |
| O | -3.4238272 | 4.2361956  | 13.5856796 | O                            | 2.4373940  | -4.2058310 | 0.4332704  |
| O | -2.8089859 | 6.6157136  | 14.9642351 | O                            | 0.7858125  | -1.5987082 | -2.9611393 |
| C | 1.0962828  | 7.9865782  | 15.0954017 | O                            | 5.3330809  | -3.0892075 | -2.6806368 |
| C | -0.4052850 | 2.3674589  | 11.4281467 | O                            | 5.2586954  | -0.8884893 | 1.5232550  |
| C | -2.6422100 | 2.4655655  | 12.1858666 | O                            | 4.5094683  | 1.2241738  | -2.2722456 |
| C | 2.1861054  | 7.0372936  | 14.6605286 | C                            | -0.4131675 | 3.5261808  | -0.4177547 |
| C | 0.7468410  | 3.2167934  | 10.9495242 | C                            | 0.1209165  | 2.1124965  | 2.8463286  |
| C | -1.1458550 | 8.0944117  | 15.8434285 | C                            | 2.6895731  | -3.1782306 | -0.0477390 |
| C | -3.7816574 | 3.4133606  | 12.4728110 | C                            | 1.7186849  | -1.5470832 | -2.2697178 |
| C | 2.2983149  | 4.8627671  | 11.6794111 | C                            | 1.0380154  | 1.9887101  | -2.6144856 |
| C | -2.3609202 | 7.2583155  | 16.1638503 | C                            | -0.8639334 | -2.1360901 | 0.0600975  |
| C | 2.8113180  | 5.5452862  | 12.9245455 | C                            | -2.2558279 | 0.0071535  | -1.1905353 |
| C | -4.4221374 | 5.2120353  | 13.8862082 | C                            | -1.6169330 | -3.2558304 | -0.6797820 |
| C | -4.0395114 | 5.9099933  | 15.1693189 | C                            | 2.0622932  | 1.7904369  | 0.4269654  |
| H | 0.8506174  | 8.6821185  | 14.2789855 | C                            | -1.3837410 | -4.6236956 | -0.0215468 |
| H | 1.4478958  | 8.5705735  | 15.9593820 | C                            | -2.5538822 | -0.5359207 | -2.6087283 |
| H | -0.6752294 | 1.6438704  | 10.6440918 | C                            | -3.5323234 | -0.0863256 | -0.3206570 |
| H | -0.1227580 | 1.8183374  | 12.3360720 | C                            | 2.1906798  | 4.3058060  | 2.3520489  |
| H | -2.3584693 | 1.9199033  | 13.0962389 | C                            | -1.2756030 | -2.1265059 | 1.5576276  |
| H | 0.4207676  | 3.8706211  | 10.1264011 | C                            | -3.7334571 | 0.2025518  | -3.2568079 |
| H | -2.9586526 | 1.7397339  | 11.4211614 | C                            | 3.1519760  | 1.5985652  | 3.2777163  |
| H | 2.3800375  | 6.2862242  | 15.4387970 | C                            | 4.5769836  | -2.4821143 | -2.0232172 |
| H | -2.1232546 | 6.5026417  | 16.9268309 | C                            | -4.7159819 | 0.6463974  | -0.9680992 |
| H | 3.1099715  | 7.6108270  | 14.4900649 | C                            | 2.4214695  | 4.2969482  | -1.2627547 |
| H | -1.3750971 | 8.7954385  | 15.0266705 | C                            | -1.7721001 | -4.6051573 | 1.4635196  |
| H | -0.8610741 | 8.6761191  | 16.7333378 | C                            | 4.5536574  | -1.0967792 | 0.6223317  |
|   |            |            |            | C                            | -1.0304381 | -3.4908911 | 2.2145332  |

|                                                |            |            |            |    |            |            |            |
|------------------------------------------------|------------|------------|------------|----|------------|------------|------------|
| C                                              | 4.0187405  | 0.2806851  | -1.8008707 | C  | 0.2354614  | -1.2192331 | -3.4483575 |
| C                                              | -4.9915157 | 0.1182228  | -2.3822526 | C  | 2.3941936  | -0.7535845 | -2.2377362 |
| H                                              | -0.8664395 | 4.0724313  | -1.2552930 | H  | 0.5314519  | 0.2975143  | -1.9410636 |
| H                                              | -0.6199929 | 2.7546109  | 2.3581450  | C  | -0.0820421 | -4.2077537 | -0.2851024 |
| H                                              | -0.1632165 | 1.0692390  | 2.6757307  | C  | 2.1825399  | -3.1872665 | 0.1429468  |
| H                                              | -0.3256417 | 4.2228312  | 0.4238667  | H  | 1.2791464  | -3.4690579 | -1.7739882 |
| H                                              | 0.0793012  | 2.3040763  | 3.9260435  | C  | -2.2274950 | -0.0012198 | 1.8251579  |
| H                                              | -1.0957922 | 2.7225326  | -0.1267184 | H  | 0.3904516  | 1.9140157  | -0.1851131 |
| H                                              | 0.2933975  | 1.1921616  | -2.5718785 | W  | -3.5215643 | 0.2650719  | -1.5385276 |
| H                                              | 0.2081897  | -2.3951614 | 0.0442468  | C  | 0.7537319  | -0.4280438 | -4.6573977 |
| H                                              | -1.3025863 | -3.2905537 | -1.7295869 | H  | -0.8541740 | -1.1415541 | -3.4052433 |
| H                                              | -2.0299744 | 1.0787508  | -1.3093348 | H  | 0.4689198  | -2.2851569 | -3.5916225 |
| H                                              | 0.6969375  | 2.7451941  | -3.3349539 | C  | 2.9015478  | 0.0523244  | -3.4386710 |
| H                                              | -0.3198763 | -4.8837227 | -0.1094060 | H  | 2.7356164  | -1.7935329 | -2.3463948 |
| H                                              | -1.6622411 | -0.4443521 | -3.2389589 | H  | 2.8526186  | -0.3653972 | -1.3219691 |
| H                                              | 1.9706878  | 1.5654055  | -2.9973749 | C  | 0.5299304  | -5.6124337 | -0.2091227 |
| H                                              | -3.3396800 | 0.3285977  | 0.6772742  | H  | -0.9602369 | -4.2149642 | -0.9391987 |
| H                                              | 1.4627108  | 4.9119972  | 1.8015624  | H  | -0.4392816 | -3.9172678 | 0.7090015  |
| H                                              | -3.4612285 | 1.2593564  | -3.3947334 | C  | 2.8007495  | -4.5907478 | 0.2176114  |
| H                                              | -1.9498396 | -5.4021264 | -0.5504157 | H  | 2.9352425  | -2.4726363 | -0.2069376 |
| H                                              | -4.4819729 | 1.7196156  | -1.0244895 | H  | 1.8981385  | -2.8712656 | 1.1545570  |
| H                                              | -0.7178994 | -1.3440729 | 2.0851144  | Si | -1.9039882 | 1.4513097  | 3.0011144  |
| H                                              | 2.1365890  | 4.5997272  | 3.4089771  | Si | -2.0847081 | -1.7181232 | 2.6003843  |
| H                                              | 0.0467876  | -3.7061829 | 2.1986317  | H  | -3.3140671 | 0.0597449  | 1.6660706  |
| H                                              | 3.1610718  | 0.5163565  | 3.1168228  | N  | 1.1642882  | 2.6012892  | -0.2438040 |
| H                                              | 3.1410899  | 1.8148286  | 0.2166710  | C  | -2.3485818 | 1.1676283  | -2.9671631 |
| H                                              | -2.7898214 | -1.6065860 | -2.5522744 | C  | -5.0331482 | 0.3586466  | -2.8608058 |
| H                                              | 2.9697115  | 1.7876872  | 4.3428519  | C  | -3.0107700 | -1.6469112 | -2.0766944 |
| H                                              | 2.0041082  | 4.9499938  | -2.0408310 | C  | -3.9990956 | 2.0832862  | -0.7208592 |
| H                                              | -3.8004169 | -1.1423525 | -0.1751359 | C  | -4.8415738 | -0.5489215 | -0.1998653 |
| H                                              | -3.9372760 | -0.2083756 | -4.2546067 | C  | 2.2831662  | -0.4588858 | -4.7440977 |
| H                                              | -2.3427170 | -1.8754640 | 1.6398404  | H  | 0.3095256  | -0.8288178 | -5.5784427 |
| H                                              | 2.5863879  | 4.9049872  | -0.3671656 | H  | 0.4196660  | 0.6129038  | -4.5730022 |
| H                                              | -1.5632074 | -5.5795363 | 1.9238976  | H  | 2.6358834  | 1.1072054  | -3.3013595 |
| H                                              | 3.1911679  | 4.5668168  | 1.9863653  | H  | 3.9981817  | 0.0012418  | -3.4881476 |
| H                                              | -5.6137316 | 0.5466489  | -0.3433983 | C  | 1.7736653  | -5.6281397 | 0.6887561  |
| H                                              | 3.3988038  | 3.9437787  | -1.6143669 | H  | 0.8129784  | -5.9402652 | -1.2209350 |
| H                                              | 4.1552133  | 1.9707395  | 3.0338242  | H  | -0.2136568 | -6.3313365 | 0.1608915  |
| H                                              | -2.8561346 | -4.4362838 | 1.5504089  | H  | 3.1673408  | -4.8737986 | -0.7806054 |
| H                                              | -5.8173666 | 0.6753784  | -2.8434530 | H  | 3.6713472  | -4.5852500 | 0.8879146  |
| H                                              | -1.3425454 | -3.4676937 | 3.2672180  | C  | -1.5398799 | 3.0657818  | 2.1066756  |
| H                                              | -5.3125134 | -0.9321149 | -2.3165328 | C  | -0.4900129 | 1.1545413  | 4.2242618  |
| H                                              | -2.6949538 | -3.0380682 | -0.6796711 | C  | -3.4867705 | 1.7608476  | 3.9947039  |
|                                                |            |            |            | C  | -2.9324494 | -3.0077545 | 1.5200250  |
|                                                |            |            |            | C  | -0.3165725 | -2.2123525 | 3.0318222  |
|                                                |            |            |            | C  | -3.0456444 | -1.7537794 | 4.2390762  |
|                                                |            |            |            | Si | 0.8503628  | 3.9583133  | -1.2766657 |
|                                                |            |            |            | Si | 2.4724122  | 2.2338536  | 0.8278076  |
|                                                |            |            |            | O  | -1.7659282 | 1.7144912  | -3.8097640 |
|                                                |            |            |            | O  | -5.9082324 | 0.4004659  | -3.6326262 |
|                                                |            |            |            | O  | -2.7383752 | -2.7483862 | -2.3214600 |
|                                                |            |            |            | O  | -4.3149933 | 3.0840217  | -0.2208669 |
| <b>5a-HN(SiMe<sub>3</sub>)<sub>2</sub>.xyz</b> |            |            |            |    |            |            |            |
| 104                                            |            |            |            |    |            |            |            |
| Energy = -3278.580346908                       |            |            |            |    |            |            |            |
| B                                              | 0.3279494  | -1.6790363 | -0.9256588 |    |            |            |            |
| O                                              | -0.6515760 | -1.3157422 | -0.0439989 |    |            |            |            |
| C                                              | 0.8535814  | -0.7420200 | -2.1060929 |    |            |            |            |
| C                                              | 0.9308868  | -3.1553970 | -0.7733223 |    |            |            |            |
| P                                              | -1.4455013 | 0.2243029  | 0.1147318  |    |            |            |            |

|                |                 |            |            |    |            |            |            |
|----------------|-----------------|------------|------------|----|------------|------------|------------|
| O              | -5.6452415      | -0.9769627 | 0.5225232  | O  | 9.7089154  | 3.0402830  | 30.3588104 |
| H              | 2.6300641       | 0.1418289  | -5.5953715 | P  | 9.4298097  | 4.0514067  | 31.7325063 |
| H              | 2.6189009       | -1.4920032 | -4.9227233 | Si | 11.7104801 | 5.9547950  | 31.7807462 |
| H              | 2.2232802       | -6.6301973 | 0.7101579  | Si | 12.4506948 | 2.8235291  | 31.8580356 |
| H              | 1.4736259       | -5.3900189 | 1.7198187  | W  | 8.1220429  | 2.8028876  | 33.6874261 |
| H              | -1.4207369      | 3.8692090  | 2.8469473  | O  | 10.7644669 | 1.6855391  | 35.1240574 |
| H              | -2.3642112      | 3.3440047  | 1.4429749  | O  | 5.3060305  | 4.0435558  | 32.7519706 |
| H              | -0.6278831      | 3.0199574  | 1.5056119  | O  | 6.5019006  | 1.3371923  | 35.9901420 |
| H              | -0.3334122      | 2.0596392  | 4.8258624  | O  | 8.0210364  | 0.4758754  | 31.4826751 |
| H              | -0.7054492      | 0.3313994  | 4.9145235  | O  | 8.6701808  | 5.5385012  | 35.2713162 |
| H              | 0.4528327       | 0.9284698  | 3.7169851  | C  | 10.5887089 | 7.1861688  | 32.6701993 |
| H              | -3.3600628      | 2.6299672  | 4.6535052  | C  | 10.7416635 | 2.1371272  | 27.7671826 |
| H              | -4.3204559      | 1.9803315  | 3.3159779  | C  | 10.8417654 | -0.1298974 | 26.6497636 |
| H              | -3.7772282      | 0.9077656  | 4.6154170  | C  | 11.1456574 | 1.3673160  | 26.5032772 |
| H              | -2.5966825      | -2.9575359 | 0.4832240  | C  | 11.5245418 | 6.2016587  | 29.9189471 |
| H              | -4.0170698      | -2.8537895 | 1.5375829  | C  | 11.2220257 | 4.1966612  | 32.2862611 |
| H              | -2.7329447      | -4.0194881 | 1.8966913  | C  | 11.7234178 | 1.0871593  | 31.7483187 |
| H              | -0.2763310      | -3.2733197 | 3.3104526  | C  | 13.4865362 | 6.3911524  | 32.2838530 |
| H              | 0.3555628       | -2.0568527 | 2.1869091  | C  | 13.3674058 | 3.1627102  | 30.2403554 |
| H              | 0.0618513       | -1.6311450 | 3.8794251  | C  | 13.7522393 | 2.7951283  | 33.2348779 |
| H              | -4.0930119      | -1.4616689 | 4.0994919  | C  | 4.8117002  | 3.1947155  | 28.9950855 |
| H              | -2.6115559      | -1.1027443 | 5.0061022  | C  | 4.8529744  | 4.5988723  | 28.3770420 |
| H              | -3.0389104      | -2.7787335 | 4.6348849  | C  | 6.1744218  | 2.4947292  | 28.8876265 |
| C              | 1.7363225       | 5.4878057  | -0.6044525 | C  | 5.9649428  | 5.4467334  | 29.0089181 |
| C              | 1.4696799       | 3.6858024  | -3.0381423 | C  | 6.3400778  | 3.5914132  | 33.0336981 |
| C              | -0.9986974      | 4.2796089  | -1.3330350 | C  | 7.0912659  | 1.8946686  | 35.1446232 |
| C              | 2.5320670       | 3.3962818  | 2.3185979  | C  | 7.3013512  | 3.3299800  | 29.5206619 |
| C              | 2.2233683       | 0.4794465  | 1.4588211  | C  | 7.3277000  | 4.7513350  | 28.8935957 |
| C              | 4.1305545       | 2.3830848  | -0.0665732 | C  | 8.0357603  | 1.2807786  | 32.3207584 |
| H              | 2.8207137       | 5.3421541  | -0.5273633 | C  | 8.4517421  | 4.5377122  | 34.7184756 |
| H              | 1.3616097       | 5.7573595  | 0.3894653  | C  | 8.9744021  | 0.4179524  | 28.2740437 |
| H              | 1.5688811       | 6.3441874  | -1.2705470 | C  | 9.3684253  | -0.3609627 | 27.0113150 |
| H              | 1.2898119       | 4.5734096  | -3.6592674 | C  | 9.2580209  | 1.9350891  | 28.1227474 |
| H              | 0.9521388       | 2.8424768  | -3.5080691 | C  | 9.8294046  | 2.0762213  | 34.5523035 |
| H              | 2.5458059       | 3.4749369  | -3.0559648 | H  | 10.5282052 | 5.8810573  | 29.5943402 |
| H              | -1.5471703      | 3.3416681  | -1.4656843 | H  | 10.8388514 | 8.2164084  | 32.3848143 |
| H              | -1.2657956      | 4.9411014  | -2.1661328 | H  | 10.5879917 | 1.7654797  | 25.6421798 |
| H              | -1.3548581      | 4.7364770  | -0.4041150 | H  | 10.6891054 | 7.1016339  | 33.7591007 |
| H              | 1.5938723       | 3.3541423  | 2.8834539  | H  | 11.0983930 | -0.6665330 | 25.7269544 |
| H              | 2.6904856       | 4.4371883  | 2.0141343  | H  | 10.9597184 | 3.2060534  | 27.6463416 |
| H              | 3.3475809       | 3.1196784  | 3.0002062  | H  | 11.4743334 | -0.5456580 | 27.4479479 |
| H              | 2.5490289       | -0.2697972 | 0.7311975  | H  | 11.3517719 | 1.7892843  | 28.6093378 |
| H              | 1.1595588       | 0.2980318  | 1.6489160  | H  | 11.1895142 | 4.1979489  | 33.3857863 |
| H              | 2.7733095       | 0.2996347  | 2.3903726  | H  | 11.6418561 | 7.2629085  | 29.6643940 |
| H              | 4.1730258       | 1.7067192  | -0.9277137 | H  | 10.9621248 | 1.0253769  | 30.9678679 |
| H              | 4.2971964       | 3.4021040  | -0.4372972 | H  | 12.2668623 | 5.6323931  | 29.3506053 |
| H              | 4.9659226       | 2.1356164  | 0.6013924  | H  | 12.2124563 | 1.5173412  | 26.2891532 |
|                |                 |            |            | H  | 11.2701906 | 0.7682949  | 32.6908829 |
|                |                 |            |            | H  | 12.6749361 | 3.2919912  | 29.4049675 |
|                |                 |            |            | H  | 12.5297919 | 0.3803779  | 31.5089323 |
|                |                 |            |            | H  | 13.7021705 | 7.4381478  | 32.0326592 |
|                |                 |            |            | H  | 13.6270010 | 6.2742187  | 33.3656288 |
| <b>5a</b> .xyz |                 |            |            |    |            |            |            |
| 76             |                 |            |            |    |            |            |            |
| Energy =       | -2404.377605040 |            |            |    |            |            |            |
| B              | 8.7734039       | 2.7536575  | 29.3995556 |    |            |            |            |

|   |            |            |            |   |            |            |            |
|---|------------|------------|------------|---|------------|------------|------------|
| H | 13.9925516 | 4.0603371  | 30.3068609 | C | -4.0695983 | -3.9302053 | 0.2125844  |
| H | 14.2340709 | 5.7677299  | 31.7810312 | C | 3.7516547  | -0.3276380 | -2.1694127 |
| H | 13.2920016 | 2.5542552  | 34.2003872 | C | 3.4331858  | 1.8411077  | 4.3648738  |
| H | 14.0260324 | 2.3162833  | 30.0052870 | C | -3.2743193 | -2.4635961 | -1.6877943 |
| H | 14.2593433 | 3.7614888  | 33.3345486 | C | 4.1741621  | -4.3633857 | 1.2811969  |
| H | 14.5169263 | 2.0341984  | 33.0295041 | C | -3.4638588 | 0.4763749  | 4.6089782  |
| H | 4.0342606  | 2.5899506  | 28.5091495 | C | 3.7627484  | 1.5784010  | 1.5311903  |
| H | 3.8810540  | 5.0956187  | 28.4947161 | C | -2.9804906 | 1.3135722  | 3.4183405  |
| H | 4.5374207  | 3.2793651  | 30.0555516 | C | 4.0501883  | -0.6848718 | 3.1509817  |
| H | 5.0383162  | 4.5115284  | 27.2956545 | C | -4.4906598 | -3.1138644 | -1.0162513 |
| H | 6.1230800  | 1.5109162  | 29.3698618 | H | 0.3375150  | -4.1706228 | 0.1110304  |
| H | 5.7395204  | 5.6045761  | 30.0725896 | H | 0.7047392  | -2.9916460 | -2.0162264 |
| H | 6.4035796  | 2.3146503  | 27.8264604 | H | 0.5737484  | -1.2354710 | -2.0608262 |
| H | 6.0032566  | 6.4370984  | 28.5353333 | H | 1.2161620  | -5.5708134 | 0.7460409  |
| H | 7.0611881  | 3.4672957  | 30.5863743 | H | 1.2746020  | -2.1169613 | -3.4460250 |
| H | 7.6055910  | 4.6740673  | 27.8309057 | H | 1.6993779  | -4.8520258 | -0.7941021 |
| H | 7.9181204  | 0.2463894  | 28.5071734 | H | 0.9212115  | -2.7718628 | 2.9935730  |
| H | 8.0982215  | 5.3504411  | 29.3951986 | H | -0.5926484 | -0.0487191 | 2.9842012  |
| H | 8.7353783  | -0.0299727 | 26.1745223 | H | -1.1839525 | -2.1215701 | 4.2139283  |
| H | 8.6547673  | 2.2774855  | 27.2624875 | H | -1.4220189 | -3.2585076 | 0.1579027  |
| H | 9.1769863  | -1.4331610 | 27.1527466 | H | 1.5886914  | -4.3864689 | 3.2869024  |
| H | 9.5396052  | 7.0003236  | 32.4153711 | H | -1.5052490 | 0.0324786  | 5.4040726  |
| H | 9.5473276  | 0.0348258  | 29.1293209 | H | -2.9740337 | -3.6937617 | 2.0651373  |
|   |            |            |            | H | 2.5616268  | -2.9531050 | 3.6279352  |
|   |            |            |            | H | -1.6002766 | -1.1818321 | -1.1744341 |
|   |            |            |            | H | 3.5923015  | -4.3185136 | -1.9250173 |
|   |            |            |            | H | -3.4413867 | -4.7715624 | -0.1140523 |
|   |            |            |            | H | -2.7427372 | -1.1258536 | 5.8865723  |
|   |            |            |            | H | -2.6172544 | -3.2482809 | -2.0889726 |
|   |            |            |            | H | -2.1606647 | 1.0277281  | 1.4296442  |
|   |            |            |            | H | 4.0878985  | -3.2830683 | -3.2706780 |
|   |            |            |            | H | -2.1268724 | 1.9278096  | 3.7317576  |
|   |            |            |            | H | 3.1698503  | 0.5600256  | -1.9068298 |
|   |            |            |            | H | 3.7414430  | -1.4751775 | 0.6748978  |
|   |            |            |            | H | -3.9344369 | -2.2906088 | 1.6105969  |
|   |            |            |            | H | 3.8909610  | -0.3322080 | -3.2581659 |
|   |            |            |            | H | 4.0669195  | -5.3261000 | 1.7977415  |
|   |            |            |            | H | -3.1089512 | -0.7724976 | -0.3623801 |
|   |            |            |            | H | -4.9529004 | -4.3631417 | 0.6988773  |
|   |            |            |            | H | -3.4351199 | -0.1100264 | 1.8612584  |
|   |            |            |            | H | 4.6028682  | -4.5640436 | 0.2939894  |
|   |            |            |            | H | -3.7416190 | 1.1314850  | 5.4439059  |
|   |            |            |            | H | 5.0082882  | -3.2706393 | -1.7603168 |
|   |            |            |            | H | -3.5957091 | -1.8487042 | -2.5398433 |
|   |            |            |            | H | 4.8942838  | -3.7627516 | 1.8475307  |
|   |            |            |            | H | 4.7417594  | -0.2244977 | -1.7085856 |
|   |            |            |            | H | -4.3711562 | -0.0749280 | 4.3199727  |
|   |            |            |            | H | -5.0296445 | -3.7480243 | -1.7313179 |
|   |            |            |            | H | -3.7720765 | 2.0029399  | 3.0925105  |
|   |            |            |            | H | -5.1899985 | -2.3249628 | -0.7008101 |
|   |            |            |            | H | -2.8298682 | -2.0466436 | 3.5945246  |
|   |            |            |            | K | 0.1242703  | 2.0884767  | -1.4193170 |

5.xyz  
119  
Energy = -3927.851705331

|    |            |            |            |
|----|------------|------------|------------|
| B  | -1.0590998 | -1.5052161 | 1.4114696  |
| O  | 0.1852101  | -1.4428801 | 0.8554911  |
| P  | 1.5642541  | -0.4353598 | 0.7668589  |
| Si | 2.4988079  | -3.4935393 | 1.1780166  |
| Si | 2.9144448  | -1.9070493 | -1.5619287 |
| W  | 2.5627700  | 0.7164519  | 2.9396871  |
| O  | 0.2090807  | 2.9002854  | 2.8464182  |
| O  | 1.0505442  | -0.8947783 | 5.2779106  |
| O  | 3.9398407  | 2.5028209  | 5.1776404  |
| O  | 4.5072810  | 2.0206669  | 0.7518885  |
| O  | 4.9109825  | -1.4471723 | 3.2965012  |
| C  | 1.3299342  | -4.6196120 | 0.2105601  |
| C  | 1.2079594  | -2.0800197 | -2.3517105 |
| C  | 1.0554152  | 2.1011643  | 2.8351508  |
| C  | 1.5445396  | -0.3165711 | 4.4052954  |
| C  | 1.8298244  | -3.3749325 | 2.9340373  |
| C  | -1.4756147 | -0.6197118 | 2.6619127  |
| C  | -2.0400988 | -2.4368586 | 0.5535360  |
| C  | -1.9684360 | -1.4322618 | 3.8829817  |
| C  | 2.7613312  | -1.8205530 | 0.3143002  |
| C  | -2.3828426 | -0.5200928 | 5.0455024  |
| C  | -3.2754586 | -3.0752617 | 1.2117807  |
| C  | -2.4811753 | -1.6143466 | -0.6874894 |
| C  | 3.9963898  | -3.3329766 | -2.1775315 |
| C  | -2.5510524 | 0.4139366  | 2.2522399  |

|                           |            |            |            |    |            |            |            |
|---------------------------|------------|------------|------------|----|------------|------------|------------|
| O                         | -0.2314291 | 1.2492393  | -4.2785540 | Si | 0.8736678  | -1.6577526 | -2.5623497 |
| O                         | -0.1369746 | 4.4152298  | 0.2248199  | Si | 0.6973101  | 1.4834124  | -3.3237617 |
| O                         | 2.1203172  | 4.2792710  | -1.3860739 | W  | 3.8563200  | 0.1618714  | 0.5827163  |
| O                         | 2.1752442  | 2.4301343  | -3.4813223 | O  | 3.0761809  | 2.1469097  | 2.9987156  |
| O                         | -2.5101327 | 1.3016218  | -2.6386172 | O  | 2.8815056  | -2.4527325 | 2.1812969  |
| O                         | -2.5362890 | 3.3739497  | -0.7330758 | O  | 6.7822855  | -0.0687606 | 1.8222983  |
| C                         | 0.9471854  | 5.3301586  | 0.3939536  | O  | 4.7436737  | 2.7122150  | -1.1655248 |
| C                         | 1.0234786  | 0.8330531  | -4.8254015 | O  | 4.8259977  | -1.6764745 | -1.8603396 |
| C                         | -1.2332356 | 0.2301651  | -4.3568576 | C  | -0.9940314 | -1.7193207 | -2.7867608 |
| C                         | 2.2266231  | 4.6362739  | -0.0022983 | C  | -1.0187655 | 2.0121397  | -2.7635566 |
| C                         | 1.9539889  | 2.0220087  | -4.8291599 | C  | 3.3194930  | 1.4235370  | 2.1315296  |
| C                         | -1.3855708 | 5.0063941  | 0.5799585  | C  | 3.2245921  | -1.5030501 | 1.6177343  |
| C                         | -2.5581592 | 0.8545926  | -3.9943632 | C  | 1.3570319  | -2.9000704 | -1.2310991 |
| C                         | 3.1271509  | 3.4931350  | -3.3899589 | C  | -0.2342982 | 0.2160909  | 2.6217872  |
| C                         | -2.4492366 | 3.9365465  | 0.5827082  | C  | -2.1882899 | 0.1987450  | 0.5347974  |
| C                         | 3.3562764  | 3.8062878  | -1.9316940 | C  | -0.3772531 | -1.2235519 | 3.1481138  |
| C                         | -3.7097241 | 1.9922179  | -2.2835141 | C  | 1.4686464  | 0.1310274  | -2.2210943 |
| C                         | -3.6173702 | 2.4460373  | -0.8477027 | C  | 0.2864461  | -1.3888720 | 4.5230749  |
| H                         | 0.7842111  | 6.2190740  | -0.2344639 | C  | -2.6987973 | -1.2493331 | 0.6548749  |
| H                         | 1.0116669  | 5.6427226  | 1.4470912  | C  | -3.2550725 | 1.1595135  | 1.0932300  |
| H                         | 0.8841424  | 0.4781022  | -5.8586627 | C  | 0.5283547  | 0.8682684  | -5.1098139 |
| H                         | 1.4471259  | 0.0169978  | -4.2271119 | C  | -0.8456188 | 1.1944610  | 3.6424401  |
| H                         | -0.9905221 | -0.6013233 | -3.6815716 | C  | -4.0358375 | -1.4413380 | -0.0761353 |
| H                         | 1.5158176  | 2.8510275  | -5.4060794 | C  | 1.8706705  | 2.9505190  | -3.4069567 |
| H                         | -1.2925671 | -0.1623158 | -5.3840403 | C  | 5.7118343  | 0.0166346  | 1.3722863  |
| H                         | 2.3885468  | 3.7422627  | 0.6130156  | C  | -4.5996869 | 0.9908497  | 0.3696237  |
| H                         | -2.2028981 | 3.1576514  | 1.3143988  | C  | 1.7366617  | -2.2512801 | -4.1386717 |
| H                         | 3.0748769  | 5.3202785  | 0.1506889  | C  | -0.2997579 | -0.3973828 | 5.5384514  |
| H                         | -1.6363865 | 5.8032791  | -0.1372611 | C  | 4.4039628  | 1.8093299  | -0.5272678 |
| H                         | -1.3229044 | 5.4427730  | 1.5883729  | C  | -0.1973381 | 1.0471189  | 5.0274199  |
| H                         | 2.9075997  | 1.7320110  | -5.2982250 | C  | 4.4536507  | -1.0238517 | -0.9738743 |
| H                         | 2.7465545  | 4.3792248  | -3.9205530 | C  | -5.0954400 | -0.4605574 | 0.4468586  |
| H                         | 3.6997675  | 2.9151405  | -1.3930205 | H  | -1.4905019 | -1.3206301 | -1.8975751 |
| H                         | -2.7624414 | 1.7087819  | -4.6578861 | H  | -1.7143173 | 1.1669873  | -2.7445577 |
| H                         | -3.3611703 | 0.1114385  | -4.1189167 | H  | -1.0236040 | 2.4725117  | -1.7726033 |
| H                         | 4.1303680  | 4.5844432  | -1.8430268 | H  | -1.3250144 | -2.7568547 | -2.9217625 |
| H                         | -3.4142349 | 4.3873486  | 0.8624686  | H  | -1.4079837 | 2.7509890  | -3.4767339 |
| H                         | 4.0784097  | 3.1845906  | -3.8502535 | H  | -1.3341098 | -1.1447072 | -3.6549482 |
| H                         | -3.4578132 | 1.5887690  | -0.1801824 | H  | 0.8671437  | -2.6879093 | -0.2785741 |
| H                         | -3.8462662 | 2.8587128  | -2.9484557 | H  | 0.8528519  | 0.4239692  | 2.6196209  |
| H                         | -4.5772183 | 1.3226186  | -2.3954864 | H  | 0.0525855  | -1.9335232 | 2.4322259  |
| H                         | -4.5645938 | 2.9327053  | -0.5654957 | H  | -2.1296261 | 0.4136583  | -0.5483673 |
|                           |            |            |            | H  | 1.0525082  | -3.9008505 | -1.5670481 |
|                           |            |            |            | H  | 1.3656497  | -1.2070960 | 4.4229339  |
|                           |            |            |            | H  | -1.9493032 | -1.9509624 | 0.2683741  |
|                           |            |            |            | H  | 2.4383701  | -2.9262582 | -1.0651664 |
|                           |            |            |            | H  | -2.9073062 | 2.1957729  | 1.0100124  |
|                           |            |            |            | H  | -0.1618874 | 0.0257793  | -5.2207558 |
|                           |            |            |            | H  | -3.8847178 | -1.2668671 | -1.1518874 |
|                           |            |            |            | H  | 0.1707758  | -2.4187765 | 4.8894185  |
|                           |            |            |            | H  | -4.4712431 | 1.2702037  | -0.6869039 |
|                           |            |            |            | H  | -0.7402624 | 2.2248294  | 3.2834648  |
| <b>6a<sup>-</sup>.xyz</b> |            |            |            |    |            |            |            |
| 79                        |            |            |            |    |            |            |            |
| Energy = -2593.090468579  |            |            |            |    |            |            |            |
| B                         | -0.6766886 | 0.4459406  | 1.0731321  |    |            |            |            |
| O                         | 0.2660292  | -0.3954031 | 0.1798658  |    |            |            |            |
| P                         | 1.5152435  | 0.4133921  | -0.4010912 |    |            |            |            |
| C                         | 0.7935231  | 2.1064320  | 0.0286317  |    |            |            |            |
| O                         | -0.3042607 | 1.9153982  | 0.7245815  |    |            |            |            |
| O                         | 1.2854310  | 3.1911231  | -0.2478255 |    |            |            |            |

|   |            |            |            |   |            |            |            |
|---|------------|------------|------------|---|------------|------------|------------|
| H | 0.1432242  | 1.6947189  | -5.7223183 | C | -2.8152455 | 3.8100375  | 17.7394085 |
| H | 0.8627114  | 1.3285543  | 4.9538885  | C | -3.1562426 | -1.3474580 | 15.4697636 |
| H | 2.0183066  | 3.3963794  | -2.4196463 | C | 3.6334275  | 2.4209216  | 13.8247322 |
| H | 2.5289419  | 0.1196241  | -2.5169480 | C | 3.4187495  | 4.3092162  | 20.4242015 |
| H | -2.8418524 | -1.5012487 | 1.7146259  | C | -3.8429413 | 0.6363541  | 14.0427612 |
| H | 1.4699498  | 3.7183987  | -4.0818320 | C | 3.9471145  | -1.8787101 | 16.8637697 |
| H | 1.4711097  | -3.2998737 | -4.3270959 | C | -3.7884536 | 3.7014180  | 20.0741978 |
| H | -3.4036299 | 0.9616813  | 2.1646810  | C | 3.6933041  | 4.1341688  | 17.5193229 |
| H | -4.3936796 | -2.4753337 | 0.0308775  | C | -3.2130237 | 4.6161090  | 18.9837814 |
| H | -1.9244456 | 0.9998833  | 3.7359184  | C | 3.9803804  | 1.8005659  | 19.1774469 |
| H | 1.4694315  | -1.6736255 | -5.0275446 | C | -4.2945597 | -0.6871905 | 14.6773412 |
| H | 0.2052355  | -0.4977364 | 6.5093661  | H | 0.0569358  | -1.3722778 | 15.8825142 |
| H | 1.4961607  | 0.5722530  | -5.5306851 | H | 0.4374463  | -0.0683432 | 13.7585777 |
| H | -5.3561987 | 1.6694310  | 0.7890127  | H | 0.3871682  | 1.6952561  | 13.7202575 |
| H | 2.8256608  | -2.2055961 | -4.0167483 | H | 0.8025983  | -2.9059430 | 16.3641318 |
| H | 2.8488438  | 2.6416483  | -3.7963643 | H | 1.1422594  | 0.8001890  | 12.3879056 |
| H | -1.3601501 | -0.6432140 | 5.7051274  | H | 1.3184238  | -2.1056962 | 14.8722507 |
| H | -6.0352681 | -0.5763990 | -0.1109283 | H | 0.7557988  | -0.5514031 | 18.8545216 |
| H | -0.6611556 | 1.7356673  | 5.7483630  | H | -0.9535359 | 3.1745922  | 18.5453385 |
| H | -5.3174991 | -0.7049102 | 1.4969340  | H | -1.7222647 | 0.9736356  | 19.4159372 |
| H | -1.4430805 | -1.4757660 | 3.2448123  | H | -1.3571691 | 0.5966077  | 15.0598945 |

## 6.xyz

122

Energy = -4116.632969451

|    |            |            |            |   |            |            |            |
|----|------------|------------|------------|---|------------|------------|------------|
| B  | -1.2048067 | 1.9017239  | 16.7900389 | H | 1.6859094  | -2.0536377 | 19.0516221 |
| O  | 0.0523916  | 1.1380924  | 17.2421695 | H | -1.9031500 | 2.9966765  | 20.8603572 |
| P  | 1.4275780  | 1.9323422  | 17.0677684 | H | -1.7580777 | -0.8613016 | 17.0637395 |
| C  | 0.6849633  | 3.1897178  | 15.8877117 | H | 2.4526784  | -0.4949360 | 19.3714839 |
| O  | -0.6143744 | 3.0232380  | 15.8444511 | H | -2.9180634 | 2.5124383  | 14.6185282 |
| O  | 1.2779135  | 4.0954000  | 15.2997719 | H | 3.2363351  | -1.5581232 | 13.8057351 |
| Si | 2.2799027  | -0.9968388 | 16.9155131 | H | -2.3593136 | -1.6484965 | 14.7733206 |
| Si | 2.6901366  | 0.8666943  | 14.3066335 | H | -3.2537235 | 1.9043100  | 21.1723110 |
| W  | 2.5305092  | 3.2360227  | 18.9579052 | H | -3.0797857 | 0.4263288  | 13.2779066 |
| O  | 0.4465903  | 5.6616408  | 18.5995886 | H | -2.3693065 | 4.4714194  | 16.9871216 |
| O  | 0.6587190  | 1.6781772  | 21.0613512 | H | 3.7966209  | -0.4507099 | 12.5453170 |
| O  | 3.9335600  | 4.9264436  | 21.2651880 | H | -2.3225397 | 5.1282983  | 19.3746213 |
| O  | 4.3642992  | 4.6378779  | 16.7212214 | H | 3.1021404  | 3.3231599  | 14.1353443 |
| O  | 4.8302727  | 1.0220319  | 19.3040117 | H | 3.5545838  | 1.0530514  | 16.5727270 |
| C  | 0.9980441  | -1.9292206 | 15.9042085 | H | -3.3512722 | -0.1376368 | 17.2419859 |
| C  | 1.0020701  | 0.8250806  | 13.4759436 | H | 3.7710196  | 2.4549456  | 12.7361832 |
| C  | 1.1611967  | 4.7602567  | 18.7236091 | H | 3.8463880  | -2.8704749 | 17.3230210 |
| C  | 1.3239321  | 2.2483759  | 20.3083490 | H | -4.0289585 | 1.8501371  | 15.8146107 |
| C  | 1.7389303  | -1.0081181 | 18.7196289 | H | -3.5189406 | -2.2642228 | 15.9540552 |
| C  | -1.8242086 | 2.6811647  | 18.0729207 | H | -3.7225683 | 3.3829139  | 17.2889339 |
| C  | -2.0698261 | 0.9170341  | 15.8413400 | H | 4.3358928  | -2.0167271 | 15.8514325 |
| C  | -2.4278487 | 1.7729355  | 19.1594042 | H | -4.0307346 | 4.2835618  | 20.9729096 |
| C  | 2.5542197  | 0.7737972  | 16.2088964 | H | 4.7083620  | -0.5998619 | 14.0531708 |
| C  | -2.8119577 | 2.5672785  | 20.4161514 | H | -4.6879354 | 1.1144063  | 13.5272990 |
| C  | -2.5707665 | -0.3785760 | 16.5074713 | H | 4.6938416  | -1.3217363 | 17.4424239 |
| C  | -3.2425198 | 1.5807744  | 15.0943743 | H | 4.6276536  | 2.4257205  | 14.2881836 |
| C  | 3.6972196  | -0.5811563 | 13.6311880 | H | -4.7319421 | 3.2645260  | 19.7134208 |
|    |            |            |            | H | -4.6733779 | -1.3723348 | 13.9074782 |
|    |            |            |            | H | -3.9428710 | 5.3964615  | 18.7245796 |
|    |            |            |            | H | -5.1316866 | -0.4841907 | 15.3618895 |
|    |            |            |            | H | -3.3311994 | 1.2851513  | 18.7664437 |

|   |            |           |            |
|---|------------|-----------|------------|
| K | -0.6404648 | 5.4643086 | 13.8325149 |
| O | -0.8297659 | 4.2309612 | 11.1846576 |
| O | -0.7278866 | 7.5316563 | 15.7309640 |
| O | 1.6278004  | 7.2705837 | 14.1304512 |
| O | 1.6274231  | 5.2547982 | 12.1181415 |
| O | -3.1104087 | 4.4723686 | 12.8395182 |
| O | -3.1756261 | 6.6726558 | 14.6177249 |
| C | 0.4277680  | 8.3622295 | 15.8886500 |
| C | 0.4344382  | 3.7074383 | 10.7580438 |
| C | -1.8369978 | 3.2137201 | 11.2511494 |
| C | 1.6592887  | 7.5645084 | 15.5338109 |
| C | 1.4516383  | 4.8237092 | 10.7691183 |
| C | -1.9426541 | 8.2599128 | 15.9256981 |
| C | -3.1641403 | 3.8718494 | 11.5424323 |
| C | 2.6799762  | 6.2140897 | 12.2585012 |
| C | -3.0995959 | 7.2906572 | 15.9098682 |
| C | 2.8138556  | 6.5759145 | 13.7180053 |
| C | -4.3247232 | 5.1600654 | 13.1571741 |
| C | -4.2316315 | 5.7042493 | 14.5620254 |
| H | 0.3460353  | 9.2429467 | 15.2341594 |
| H | 0.5005377  | 8.7038788 | 16.9319658 |
| H | 0.3466990  | 3.2980266 | 9.7404597  |
| H | 0.7533949  | 2.9037952 | 11.4354186 |
| H | -1.5852481 | 2.4840336 | 12.0348248 |
| H | 1.1140725  | 5.6628514 | 10.1418191 |
| H | -1.9031791 | 2.6837520 | 10.2893732 |
| H | 1.6955588  | 6.6283644 | 16.1062761 |
| H | -2.9600100 | 6.5228788 | 16.6821904 |
| H | 2.5527379  | 8.1615035 | 15.7723030 |
| H | -2.0567144 | 9.0156077 | 15.1337094 |
| H | -1.9244937 | 8.7738149 | 16.8986547 |
| H | 2.4027820  | 4.4454921 | 10.3638589 |
| H | 2.4566941  | 7.1088916 | 11.6585768 |
| H | 2.9435818  | 5.6731083 | 14.3263366 |
| H | -3.3790159 | 4.6400223 | 10.7848857 |
| H | -3.9610531 | 3.1138931 | 11.5119117 |
| H | 3.6916618  | 7.2271704 | 13.8497523 |
| H | -4.0325786 | 7.8352805 | 16.1196499 |
| H | 3.6284430  | 5.7824104 | 11.9044733 |
| H | -4.0326481 | 4.8940929 | 15.2768162 |
| H | -4.4875919 | 5.9763371 | 12.4377792 |
| H | -5.1762826 | 4.4655240 | 13.0986756 |
| H | -5.1899628 | 6.1772585 | 14.8246324 |

CO<sub>2</sub>.xyz

3

Energy = -188.6977308775

|   |            |            |            |
|---|------------|------------|------------|
| C | 0.0000000  | 0.0000002  | 0.0000310  |
| O | 0.0000138  | 0.0000361  | 1.1686463  |
| O | -0.0000130 | -0.0000349 | -1.1686849 |

K'.OEt<sub>2</sub>.xyz

58

Energy = -1757.270171439

|   |            |           |            |
|---|------------|-----------|------------|
| K | -0.6510173 | 5.7161228 | 13.4515663 |
| O | -0.5714934 | 4.0832918 | 11.1301889 |
| O | -0.7688393 | 7.6896633 | 15.4607107 |
| O | 1.6543920  | 7.2590920 | 14.0466806 |
| O | 1.8451062  | 5.0375692 | 12.2929690 |
| O | -3.0313373 | 4.4942505 | 12.5101018 |
| O | -3.1686114 | 6.7315897 | 14.2609305 |
| C | 0.3240160  | 8.6159264 | 15.5036387 |
| C | 0.6879900  | 3.4194750 | 10.9594228 |
| C | -1.6716225 | 3.1675992 | 11.0505060 |
| C | 1.6170704  | 7.8511860 | 15.3523097 |
| C | 1.7905124  | 4.4509171 | 10.9859179 |
| C | -2.0336189 | 8.3459327 | 15.6179504 |
| C | -2.9609273 | 3.9410158 | 11.1887076 |
| C | 2.8746094  | 6.0301542 | 12.3942177 |
| C | -3.1312323 | 7.3100979 | 15.5726685 |
| C | 2.8897630  | 6.5742107 | 13.8027288 |
| C | -4.2331882 | 5.2507218 | 12.7103058 |
| C | -4.2410009 | 5.7915507 | 14.1199164 |
| H | 0.2202252  | 9.3548054 | 14.6954793 |
| H | 0.3287881  | 9.1475660 | 16.4664130 |
| H | 0.7081025  | 2.8959854 | 9.9925744  |
| H | 0.8321313  | 2.6798679 | 11.7607696 |
| H | -1.5880894 | 2.4117388 | 11.8454863 |
| H | 1.6017363  | 5.2310165 | 10.2340456 |
| H | -1.6619561 | 2.6534157 | 10.0784975 |
| H | 1.6929347  | 7.0680545 | 16.1214594 |
| H | -2.9503252 | 6.5257769 | 16.3225367 |
| H | 2.4627246  | 8.5432882 | 15.4743712 |
| H | -2.1735907 | 9.0857077 | 14.8160806 |
| H | -2.0679738 | 8.8670084 | 16.5858528 |
| H | 2.7485554  | 3.9638083 | 10.7527585 |
| H | 2.6857219  | 6.8391200 | 11.6734856 |
| H | 3.0162615  | 5.7577357 | 14.5294662 |
| H | -3.0029368 | 4.7487151 | 10.4435043 |
| H | -3.8105437 | 3.2636043 | 11.0196286 |
| H | 3.7334334  | 7.2708674 | 13.9120458 |
| H | -4.0929628 | 7.7939806 | 15.7964185 |
| H | 3.8533049  | 5.5818476 | 12.1691814 |
| H | -4.1214927 | 4.9736969 | 14.8460050 |
| H | -4.2796995 | 6.0754475 | 11.9842630 |
| H | -5.1118575 | 4.6056902 | 12.5647229 |
| H | -5.2034893 | 6.2878224 | 14.3111381 |
| O | -0.4938127 | 3.7037713 | 15.2559883 |
| C | 0.7235143  | 3.4142397 | 15.9748162 |
| C | 1.6933986  | 2.5849057 | 15.1419506 |
| H | 0.4834097  | 2.9126966 | 16.9205259 |
| H | 1.1571036  | 4.3894778 | 16.2187730 |
| H | 2.6120415  | 2.4027041 | 15.7110605 |
| H | 1.2614500  | 1.6130810 | 14.8812784 |

|   |            |           |            |
|---|------------|-----------|------------|
| H | 1.9516178  | 3.1137100 | 14.2193124 |
| C | -1.4922605 | 2.6656194 | 15.3512671 |
| C | -2.2910751 | 2.7550806 | 16.6455615 |
| H | -1.0131979 | 1.6826720 | 15.2511293 |
| H | -2.1440490 | 2.8153326 | 14.4854072 |
| H | -3.0623115 | 1.9768946 | 16.6610495 |
| H | -1.6532077 | 2.6140164 | 17.5237616 |
| H | -2.7802722 | 3.7309928 | 16.7272804 |

**K<sup>+</sup>.xyz K(18-crown-6)<sup>+</sup>**

43

Energy = -1523.452450113

|   |            |           |            |
|---|------------|-----------|------------|
| K | -0.6336195 | 5.8464783 | 13.1970043 |
| O | -0.4568844 | 4.2424696 | 10.8963107 |
| O | -0.8067888 | 7.4422547 | 15.5054729 |
| O | 1.6113455  | 7.3203995 | 14.0377083 |
| O | 1.8888392  | 5.2821023 | 12.0924341 |
| O | -2.8767436 | 4.3620528 | 12.3646529 |
| O | -3.1568269 | 6.4067206 | 14.3087041 |
| C | 0.2211785  | 8.4354933 | 15.6351792 |
| C | 0.8443511  | 3.6964579 | 10.6345308 |
| C | -1.4857364 | 3.2505332 | 10.7649634 |
| C | 1.5602460  | 7.7828603 | 15.3951714 |
| C | 1.8650452  | 4.8027615 | 10.7399318 |
| C | -2.1079809 | 7.9864524 | 15.7706097 |
| C | -2.8242174 | 3.9043123 | 11.0050843 |
| C | 2.8762440  | 6.3072626 | 12.2761220 |
| C | -3.1279293 | 6.8796070 | 15.6639433 |
| C | 2.8790120  | 6.7242600 | 13.7261976 |
| C | -4.1436601 | 4.9612098 | 12.6754367 |
| C | -4.1409114 | 5.3776643 | 14.1256449 |
| H | 0.0515077  | 9.2443639 | 14.9096118 |
| H | 0.2029905  | 8.8628280 | 16.6479198 |
| H | 0.8749512  | 3.2709871 | 9.6213228  |
| H | 1.0656574  | 2.8978786 | 11.3575996 |
| H | -1.3173315 | 2.4406630 | 11.4897240 |
| H | 1.6116863  | 5.6267784 | 10.0569355 |
| H | -1.4675681 | 2.8241511 | 9.7518190  |
| H | 1.7050220  | 6.9367940 | 16.0827959 |
| H | -2.8707368 | 6.0523553 | 16.3414318 |
| H | 2.3583437  | 8.5183153 | 15.5707518 |
| H | -2.3311026 | 8.7867961 | 15.0500049 |
| H | -2.1375381 | 8.4094000 | 16.7849068 |
| H | 2.8541679  | 4.4100736 | 10.4642226 |
| H | 2.6465793  | 7.1662054 | 11.6288202 |
| H | 3.0516454  | 5.8543518 | 14.3765722 |
| H | -2.9666245 | 4.7532186 | 10.3205855 |
| H | -3.6233238 | 3.1709196 | 10.8258467 |
| H | 3.6861385  | 7.4520754 | 13.8920989 |
| H | -4.1164690 | 7.2694846 | 15.9454748 |
| H | 3.8703815  | 5.9218757 | 12.0081833 |
| H | -3.9070723 | 4.5195299 | 14.7723952 |

|   |            |           |            |
|---|------------|-----------|------------|
| H | -4.3135596 | 5.8316065 | 12.0251022 |
| H | -4.9521784 | 4.2352794 | 12.5084370 |
| H | -5.1360218 | 5.7593451 | 14.3950759 |

**na.xyz N(SiMe<sub>3</sub>)<sub>2</sub>BCy<sub>2</sub>**

62

Energy = -1369.353965186

|    |            |            |            |
|----|------------|------------|------------|
| B  | 0.0006021  | 0.0004472  | -0.4362287 |
| C  | 0.9537348  | -2.4745517 | -0.4067178 |
| C  | 0.6450648  | -4.0173575 | -2.3877186 |
| C  | 1.5862088  | -3.5835912 | -1.2563612 |
| C  | -0.2250226 | 2.8128576  | -3.2488813 |
| C  | -0.6425682 | 4.0159288  | -2.3935608 |
| C  | 0.3974350  | 1.7024047  | -2.3914978 |
| C  | -1.5790142 | 3.5868604  | -1.2565374 |
| C  | -0.5545748 | 1.2527686  | -1.2521788 |
| C  | -0.9451968 | 2.4778787  | -0.4078445 |
| C  | -0.4004608 | -1.7064429 | -2.3853020 |
| C  | 0.2205483  | -2.8170570 | -3.2435134 |
| C  | 0.5561011  | -1.2520784 | -1.2515934 |
| H  | 2.5256131  | -3.2107699 | -1.6909396 |
| H  | 1.1232677  | -4.7810879 | -3.0136893 |
| H  | 1.6348954  | -2.1785795 | 0.3984329  |
| H  | -0.2515901 | -4.4797387 | -1.9493894 |
| H  | 0.0561050  | -2.8694798 | 0.0885427  |
| H  | 1.8454591  | -4.4455167 | -0.6281039 |
| H  | 0.4804577  | 3.1283246  | -4.0283327 |
| H  | -1.1221811 | 4.7793852  | -3.0187867 |
| H  | -1.1105379 | 2.4092144  | -3.7613653 |
| H  | 0.2573079  | 4.4772491  | -1.9607457 |
| H  | 0.6710634  | 0.8516770  | -3.0248540 |
| H  | -2.5216147 | 3.2156212  | -1.6855228 |
| H  | 1.3321671  | 2.0758620  | -1.9476357 |
| H  | -1.8328174 | 4.4507167  | -0.6287122 |
| H  | -1.4721157 | 0.8893530  | -1.7544735 |
| H  | -0.0441061 | 2.8716014  | 0.0821491  |
| H  | -0.6795492 | -0.8576890 | -3.0189633 |
| H  | -1.6230421 | 2.1850914  | 0.4012738  |
| H  | 1.1025707  | -2.4122824 | -3.7610950 |
| H  | 1.4702142  | -0.8874070 | -1.7591242 |
| H  | -0.4879439 | -3.1357837 | -4.0188919 |
| H  | -1.3319172 | -2.0814861 | -1.9359535 |
| N  | -0.0005469 | 0.0004512  | 1.0356380  |
| Si | 1.4839010  | 0.4294347  | 1.8586611  |
| Si | -1.4859756 | -0.4289090 | 1.8566760  |
| C  | 1.9142073  | -0.8071102 | 3.2127069  |
| C  | 2.8799553  | 0.4998050  | 0.5931766  |
| C  | 1.3898063  | 2.1322999  | 2.6632822  |
| C  | -1.9133849 | 0.8020563  | 3.2167139  |
| C  | -2.8826433 | -0.4896036 | 0.5914205  |
| C  | -1.3956397 | -2.1358121 | 2.6531392  |
| H  | 1.9636284  | -1.8319500 | 2.8291197  |



|   |            |            |            |
|---|------------|------------|------------|
| H | 2.6573644  | 1.2057696  | -0.2165340 |
| H | 1.1799133  | -0.7863501 | 4.0267741  |
| H | 3.0959712  | -0.4734871 | 0.1409275  |
| H | 3.7955915  | 0.8499897  | 1.0859494  |
| H | 2.8907066  | -0.5574919 | 3.6472299  |
| H | 1.2200006  | 2.9189568  | 1.9199884  |
| H | 2.3361873  | 2.3521975  | 3.1749006  |
| H | 0.5868827  | 2.1954791  | 3.4046821  |
| H | -0.5911393 | -2.2050094 | 3.3923378  |
| H | -1.9601655 | 1.8289074  | 2.8382038  |
| H | -3.0964966 | 0.4865598  | 0.1443442  |
| H | -2.6620471 | -1.1918587 | -0.2220298 |
| H | -1.1794675 | 0.7754182  | 4.0309263  |
| H | -2.3415250 | -2.3550959 | 3.1659285  |
| H | -1.2300959 | -2.9195453 | 1.9057914  |
| H | -2.8906391 | 0.5527121  | 3.6496741  |
| H | -3.7989129 | -0.8401567 | 1.0827589  |

**nb.xyz N(SiMe<sub>3</sub>)<sub>2</sub>Bcat**

40

Energy = -1280.342597606

|    |            |            |            |
|----|------------|------------|------------|
| B  | -0.4341387 | 0.0487003  | -0.0933526 |
| C  | -2.5843769 | -0.5255580 | 0.0639561  |
| C  | -3.7935157 | -1.1570969 | 0.2952324  |
| C  | -2.5097439 | 0.7403867  | -0.5216666 |
| C  | -4.9496854 | -0.4574646 | -0.0877452 |
| H  | -3.8439775 | -2.1405788 | 0.7508402  |
| C  | -3.6408257 | 1.4402453  | -0.9026227 |
| C  | -4.8751221 | 0.8106011  | -0.6726379 |
| H  | -5.9212776 | -0.9138719 | 0.0756033  |
| H  | -3.5753301 | 2.4233734  | -1.3569804 |
| H  | -5.7897133 | 1.3222469  | -0.9567085 |
| O  | -1.3094185 | -0.9751634 | 0.3470524  |
| O  | -1.1853602 | 1.1164828  | -0.6379408 |
| N  | 0.9751837  | -0.0118463 | -0.0009598 |
| Si | 1.9330014  | 1.4755534  | 0.1762696  |
| Si | 1.7268752  | -1.6268921 | 0.0568082  |
| C  | 2.8464328  | 1.8723614  | -1.4168247 |
| C  | 0.8278915  | 2.9273093  | 0.6240417  |
| C  | 3.1362217  | 1.2566566  | 1.6085858  |
| C  | 3.4624114  | -1.5586647 | -0.6683959 |
| C  | 1.7745687  | -2.2441953 | 1.8296846  |
| C  | 0.7549891  | -2.8214487 | -1.0214680 |
| H  | 3.3817452  | 2.8253190  | -1.3194430 |
| H  | 1.4684522  | 3.7746861  | 0.9012285  |
| H  | 3.5776434  | 1.1030948  | -1.6839758 |
| H  | 0.1862343  | 2.6999209  | 1.4832561  |
| H  | 0.1855452  | 3.2385559  | -0.2037823 |
| H  | 2.1378434  | 1.9688105  | -2.2481675 |
| H  | 3.8317555  | 0.4212661  | 1.4872229  |
| H  | 2.5865137  | 1.1034845  | 2.5450153  |
| H  | 3.7343468  | 2.1701274  | 1.7198672  |

|   |            |            |            |
|---|------------|------------|------------|
| H | 0.6204066  | -2.4176387 | -2.0323491 |
| H | 4.1417473  | -0.8640339 | -0.1666611 |
| H | 2.3744324  | -1.5876608 | 2.4696283  |
| H | 0.7597837  | -2.2840793 | 2.2425773  |
| H | 3.4308943  | -1.2966962 | -1.7320412 |
| H | 1.3157494  | -3.7606192 | -1.1115572 |
| H | -0.2316470 | -3.0506113 | -0.6105908 |
| H | 3.9016106  | -2.5615802 | -0.5887819 |
| H | 2.2027927  | -3.2528008 | 1.8836494  |

**nH.xyz HN(SiMe<sub>3</sub>)<sub>2</sub>**

28

Energy = -874.2186972187

|    |            |            |            |
|----|------------|------------|------------|
| H  | -0.0003360 | -0.0000148 | -1.8254237 |
| N  | -0.0000580 | -0.0000037 | -0.8088961 |
| Si | -0.0051606 | 1.5883450  | -0.0931230 |
| Si | 0.0051470  | -1.5883444 | -0.0930947 |
| C  | -1.7288869 | 2.0864963  | 0.4854082  |
| C  | 1.1517993  | 1.6203801  | 1.3927315  |
| C  | 0.5814015  | 2.8036805  | -1.4048713 |
| C  | -1.1518124 | -1.6205020 | 1.3927637  |
| C  | -0.5813248 | -2.8036995 | -1.4048644 |
| C  | 1.7289067  | -2.0863546 | 0.4854456  |
| H  | -1.7288249 | 3.0945689  | 0.9197104  |
| H  | 1.1501194  | 2.6121168  | 1.8622087  |
| H  | -2.4392365 | 2.0788001  | -0.3503019 |
| H  | 2.1811259  | 1.3858740  | 1.0975131  |
| H  | 0.8501302  | 0.8962359  | 2.1592715  |
| H  | -2.1050603 | 1.3937699  | 1.2476774  |
| H  | -0.0695185 | 2.7768285  | -2.2880652 |
| H  | 1.6025916  | 2.5731534  | -1.7311257 |
| H  | 0.5739761  | 3.8311780  | -1.0209794 |
| H  | 2.4392560  | -2.0786599 | -0.3502603 |
| H  | -2.1811025 | -1.3857748 | 1.0975937  |
| H  | -1.6025339 | -2.5732560 | -1.7311174 |
| H  | 0.0695884  | -2.7767837 | -2.2880603 |
| H  | -0.8500325 | -0.8965534 | 2.1594457  |
| H  | 2.1050543  | -1.3935607 | 1.2476649  |
| H  | 1.7289015  | -3.0944030 | 0.9198049  |
| H  | -1.1502985 | -2.6123182 | 1.8620719  |
| H  | -0.5738116 | -3.8311986 | -1.0209792 |

**K\*.n-.xyz K(18-crown-6)<sup>+</sup>N(SiMe<sub>3</sub>)<sub>2</sub><sup>-</sup>**

70

Energy = -2397.182058602

|   |            |           |            |
|---|------------|-----------|------------|
| K | -0.3426665 | 4.8062462 | 13.9504184 |
| O | -0.2150452 | 3.9126039 | 11.0760373 |
| O | -0.7120647 | 7.1456367 | 15.5421731 |
| O | 1.6896334  | 7.0352768 | 14.1146316 |
| O | 2.1683579  | 4.9198265 | 12.2643958 |
| O | -2.6331206 | 3.9499696 | 12.4736989 |
| O | -3.0560412 | 5.9300232 | 14.4745359 |

|    |            |            |            |                                                                      |            |            |            |
|----|------------|------------|------------|----------------------------------------------------------------------|------------|------------|------------|
| C  | 0.2218730  | 8.2247314  | 15.5761074 | H                                                                    | -0.3928900 | 5.8384411  | 17.5713726 |
| C  | 1.0820115  | 3.4038552  | 10.7468796 | H                                                                    | 0.2544001  | 5.2450457  | 19.1131640 |
| C  | -1.2519429 | 2.9651537  | 10.7978462 | H                                                                    | 0.3232718  | 1.8374970  | 13.2275824 |
| C  | 1.6115828  | 7.6599080  | 15.4010424 | H                                                                    | -1.3805151 | -0.0070682 | 17.4335217 |
| C  | 2.0851622  | 4.5213696  | 10.8917066 | H                                                                    | -3.3898900 | 1.3699115  | 15.3425152 |
| C  | -2.0371339 | 7.5515128  | 15.8980515 | H                                                                    | -2.7403825 | 1.8972358  | 13.7799557 |
| C  | -2.5852229 | 3.6133983  | 11.0872573 | H                                                                    | 0.3077724  | -0.2061132 | 16.9475426 |
| C  | 3.0375184  | 6.0480093  | 12.4116084 | H                                                                    | 1.3965701  | 1.0680108  | 14.3972577 |
| C  | -2.9384229 | 6.3417083  | 15.8416674 | H                                                                    | 0.1966460  | 0.0973464  | 13.5160712 |
| C  | 3.0012146  | 6.5309789  | 13.8402764 | H                                                                    | -0.9749597 | -1.0126994 | 16.0286051 |
| C  | -3.9330956 | 4.3768449  | 12.8920264 | H                                                                    | -2.7130427 | 0.1779014  | 14.2157668 |
| C  | -3.8651636 | 4.7534995  | 14.3523506 |                                                                      |            |            |            |
| H  | -0.0065119 | 8.9455935  | 14.7770364 | <b>n<sup>-</sup>.xyz N(SiMe<sub>3</sub>)<sub>2</sub><sup>-</sup></b> |            |            |            |
| H  | 0.1662886  | 8.7447785  | 16.5445774 | 27                                                                   |            |            |            |
| H  | 1.0938816  | 3.0499942  | 9.7047095  | Energy = -873.6285672814                                             |            |            |            |
| H  | 1.3380567  | 2.5596389  | 11.4033327 | N                                                                    | 0.0000000  | 0.0000000  | 0.6524479  |
| H  | -1.1205544 | 2.0684517  | 11.4199563 | Si                                                                   | 0.0000000  | 1.5802211  | 0.1825607  |
| H  | 1.7767659  | 5.3813783  | 10.2785139 | Si                                                                   | 0.0000000  | -1.5802211 | 0.1825607  |
| H  | -1.2150807 | 2.6665704  | 9.7390299  | C                                                                    | 1.5124072  | 2.1232723  | -0.8649156 |
| H  | 1.8278603  | 6.9263614  | 16.1906852 | C                                                                    | -1.5124072 | 2.1232723  | -0.8649156 |
| H  | -2.5196762 | 5.5211429  | 16.4405071 | C                                                                    | 0.0000000  | 2.7707415  | 1.6794266  |
| H  | 2.3473943  | 8.4756837  | 15.4686793 | C                                                                    | 1.5124072  | -2.1232723 | -0.8649156 |
| H  | -2.3914055 | 8.3273142  | 15.2029985 | C                                                                    | 0.0000000  | -2.7707415 | 1.6794266  |
| H  | -2.0398078 | 7.9632906  | 16.9185092 | C                                                                    | -1.5124072 | -2.1232723 | -0.8649156 |
| H  | 3.0690190  | 4.1751845  | 10.5392197 | H                                                                    | 1.4938978  | 3.1940029  | -1.1193758 |
| H  | 2.7110257  | 6.8538813  | 11.7373692 | H                                                                    | -1.4938978 | 3.1940029  | -1.1193758 |
| H  | 3.2488189  | 5.7157213  | 14.5356230 | H                                                                    | 2.4463643  | 1.9209301  | -0.3234779 |
| H  | -2.7173526 | 4.5193079  | 10.4766805 | H                                                                    | -2.4463643 | 1.9209301  | -0.3234779 |
| H  | -3.3886859 | 2.9028198  | 10.8399061 | H                                                                    | -1.5530472 | 1.5555046  | -1.8047007 |
| H  | 3.7460020  | 7.3317676  | 13.9646586 | H                                                                    | 1.5530472  | 1.5555046  | -1.8047007 |
| H  | -3.9291730 | 6.6071787  | 16.2422066 | H                                                                    | 0.8842280  | 2.5961308  | 2.3072070  |
| H  | 4.0684862  | 5.7667831  | 12.1469620 | H                                                                    | -0.8842280 | 2.5961308  | 2.3072070  |
| H  | -3.4240055 | 3.9387285  | 14.9434287 | H                                                                    | 0.0000000  | 3.8296968  | 1.3809532  |
| H  | -4.2563801 | 5.2388571  | 12.2896604 | H                                                                    | -2.4463643 | -1.9209301 | -0.3234779 |
| H  | -4.6565445 | 3.5589080  | 12.7558988 | H                                                                    | 2.4463643  | -1.9209301 | -0.3234779 |
| H  | -4.8822429 | 4.9549642  | 14.7230534 | H                                                                    | 0.8842280  | -2.5961308 | 2.3072070  |
| N  | -0.6753724 | 2.9431742  | 16.0892285 | H                                                                    | -0.8842280 | -2.5961308 | 2.3072070  |
| Si | 0.2751020  | 3.4124556  | 17.3916569 | H                                                                    | 1.5530472  | -1.5555046 | -1.8047007 |
| Si | -0.8796960 | 1.4200540  | 15.4114642 | H                                                                    | -1.5530472 | -1.5555046 | -1.8047007 |
| C  | 0.4830165  | 2.1660343  | 18.8214001 | H                                                                    | -1.4938978 | -3.1940029 | -1.1193758 |
| C  | 2.0698480  | 3.8403060  | 16.8829318 | H                                                                    | 1.4938978  | -3.1940029 | -1.1193758 |
| C  | -0.3758831 | 4.9806808  | 18.2526191 | H                                                                    | 0.0000000  | -3.8296968 | 1.3809532  |
| C  | -0.7137423 | -0.0899578 | 16.5659424 |                                                                      |            |            |            |
| C  | -2.5914544 | 1.1968578  | 14.6088444 | <b>OE<sub>t</sub><sub>2</sub>.xyz</b>                                |            |            |            |
| C  | 0.3703612  | 1.0654656  | 14.0064442 | 15                                                                   |            |            |            |
| H  | 1.0161321  | 2.6323730  | 19.6620542 | Energy = -233.7997570882                                             |            |            |            |
| H  | 2.6742063  | 4.2166801  | 17.7203050 | O                                                                    | 0.0000683  | -0.0000492 | 0.8569313  |
| H  | -0.4898442 | 1.8195819  | 19.1927263 | C                                                                    | 0.0614778  | 1.2022747  | 0.0695328  |
| H  | 2.0884444  | 4.6061976  | 16.0963826 | C                                                                    | -0.0614555 | -1.2023371 | 0.0694855  |
| H  | 2.5721874  | 2.9525891  | 16.4758783 | C                                                                    | 1.4799058  | 1.5166269  | -0.3974631 |
| H  | 1.0519138  | 1.2794081  | 18.5177626 | C                                                                    | -1.4799176 | -1.5165751 | -0.3974856 |
| H  | -1.3979303 | 4.8261727  | 18.6236033 | H                                                                    | 0.3097086  | -1.9972117 | 0.7240451  |

|   |            |            |            |
|---|------------|------------|------------|
| H | -0.3097294 | 1.9971091  | 0.7241199  |
| H | 0.6227167  | -1.1273290 | -0.7876486 |
| H | -0.6227056 | 1.1272448  | -0.7875867 |
| H | 1.4892172  | 2.4575236  | -0.9602382 |
| H | -1.4893373 | -2.4575089 | -0.9601950 |
| H | 1.8698159  | 0.7295584  | -1.0515653 |
| H | -1.8697477 | -0.7295115 | -1.0516400 |
| H | 2.1499032  | 1.6180408  | 0.4621623  |
| H | -2.1499204 | -1.6178555 | 0.4621513  |

**TS34-.xyz**

82

Energy = -3189.595228720

|    |            |            |            |
|----|------------|------------|------------|
| B  | -3.1201168 | -0.8038178 | -0.1717795 |
| P  | 0.3206883  | 0.6840322  | 0.2492370  |
| H  | 0.0430754  | 0.5696631  | 1.6484110  |
| Si | 0.0254851  | 3.3913869  | 1.7040872  |
| Si | 0.0201187  | 3.1974811  | -1.5195091 |
| W  | 2.5356910  | -0.6189502 | -0.1504768 |
| O  | 3.8024235  | 1.8414763  | -1.7758955 |
| O  | 1.3063434  | -2.8697028 | 1.7847015  |
| O  | 5.1845472  | -2.3481883 | -0.5355006 |
| O  | 1.4226766  | -1.7361698 | -2.9537261 |
| O  | 3.7856739  | 0.7220792  | 2.4818067  |
| O  | -0.9650553 | 0.3416308  | -0.5122847 |
| C  | 1.1061444  | 2.8750686  | 3.1655807  |
| C  | -1.7645323 | 2.9656885  | 2.0889236  |
| C  | 0.6274507  | 2.5162523  | 0.1441932  |
| C  | 0.2430747  | 1.9839908  | -2.9456396 |
| C  | 0.1776132  | 5.2738935  | 1.5630362  |
| C  | -1.7895623 | 3.7048543  | -1.4466394 |
| C  | 1.0770113  | 4.7173568  | -1.9238856 |
| C  | 1.7222702  | -2.0757717 | 1.0463693  |
| C  | 4.2194254  | -1.7117609 | -0.4014445 |
| C  | 1.7845192  | -1.3534677 | -1.9218703 |
| C  | 3.3113194  | 0.2349565  | 1.5389391  |
| C  | 3.3290957  | 0.9451011  | -1.2057051 |
| H  | -1.9281903 | 1.8834008  | 2.0920552  |
| H  | 0.7858852  | 3.3963003  | 4.0769452  |
| H  | 2.1600896  | 3.1192906  | 2.9900584  |
| H  | 1.7194037  | 2.6506794  | 0.1299992  |
| H  | -2.0432138 | 3.3591529  | 3.0751721  |
| H  | -0.4124492 | 1.1203376  | -2.8074912 |
| H  | -2.4455688 | 3.3937565  | 1.3478988  |
| H  | 1.2737733  | 1.6219643  | -3.0215061 |
| H  | -2.4075831 | 2.8599923  | -1.1309005 |
| H  | -0.0070843 | 2.4816884  | -3.8923557 |
| H  | -0.1034857 | 5.7434899  | 2.5151899  |
| H  | 1.2060343  | 5.5775084  | 1.3327896  |
| H  | -1.9618533 | 4.5337097  | -0.7506740 |
| H  | -0.4757048 | 5.6830111  | 0.7844192  |
| H  | 2.1387386  | 4.4457458  | -1.9774540 |

|    |            |            |            |
|----|------------|------------|------------|
| H  | -2.1384858 | 4.0242385  | -2.4369083 |
| H  | 0.9703772  | 5.5113832  | -1.1770906 |
| H  | 0.7904239  | 5.1325643  | -2.8991990 |
| H  | 1.0436684  | 1.7983511  | 3.3544292  |
| C  | -4.2558411 | 1.0855267  | 0.1792333  |
| C  | -4.8852608 | 2.2005843  | 0.7034935  |
| C  | -4.2490724 | 0.8209270  | -1.1950706 |
| C  | -5.5101590 | 3.0660667  | -0.2105049 |
| H  | -4.8840762 | 2.4011330  | 1.7695548  |
| C  | -4.8630750 | 1.6651974  | -2.1037348 |
| C  | -5.4978178 | 2.8050278  | -1.5832387 |
| H  | -6.0064782 | 3.9582122  | 0.1605613  |
| H  | -4.8441272 | 1.4575989  | -3.1688995 |
| H  | -5.9831733 | 3.4982946  | -2.2642010 |
| O  | -3.5826644 | 0.0893580  | 0.8416577  |
| O  | -3.5881164 | -0.3534500 | -1.4368629 |
| N  | -2.6327092 | -2.1126148 | 0.1074960  |
| Si | -2.1706654 | -3.1679534 | -1.2364310 |
| Si | -2.7996519 | -2.6374381 | 1.7890189  |
| C  | -0.5602754 | -4.0850191 | -0.9193449 |
| C  | -3.5513446 | -4.4291566 | -1.5059318 |
| C  | -1.9149882 | -2.1925909 | -2.8189872 |
| C  | -2.1262370 | -4.3756503 | 2.0600685  |
| C  | -1.8862800 | -1.4956978 | 2.9677683  |
| C  | -4.6341645 | -2.6805182 | 2.2267297  |
| H  | -0.3272272 | -4.6744345 | -1.8161463 |
| H  | -3.3207323 | -5.0882136 | -2.3530054 |
| H  | 0.2610509  | -3.3791825 | -0.7680756 |
| H  | -4.4949152 | -3.9148941 | -1.7252471 |
| H  | -3.7144444 | -5.0619350 | -0.6254619 |
| H  | -0.5864053 | -4.7672075 | -0.0673544 |
| H  | -1.3580502 | -1.2747219 | -2.6087311 |
| H  | -2.8601621 | -1.9163815 | -3.2937970 |
| H  | -1.3308208 | -2.8039969 | -3.5187660 |
| H  | -5.1697749 | -3.3788358 | 1.5714816  |
| H  | -1.0341614 | -4.4065718 | 2.0058506  |
| H  | -0.8164958 | -1.4814304 | 2.7429715  |
| H  | -2.2609146 | -0.4712215 | 2.9012263  |
| H  | -2.5313432 | -5.1190163 | 1.3654709  |
| H  | -4.7844971 | -3.0079540 | 3.2636416  |
| H  | -5.0882684 | -1.6908660 | 2.1113004  |
| H  | -2.4163188 | -4.6812290 | 3.0745685  |
| H  | -2.0118981 | -1.8469902 | 4.0002077  |

**TS45-.xyz**

104

Energy = -3278.583735284

|   |            |            |            |
|---|------------|------------|------------|
| B | 1.6056664  | -1.7123633 | -0.4652578 |
| O | 0.6224825  | -1.3153728 | 0.4199106  |
| C | 2.1414107  | -0.8021139 | -1.6498883 |
| C | 2.1405113  | -3.2089245 | -0.3134208 |
| P | -0.2563110 | 0.1238530  | 0.5410297  |

|    |            |            |            |                  |                 |            |            |
|----|------------|------------|------------|------------------|-----------------|------------|------------|
| C  | 1.4682038  | -1.2651761 | -2.9719174 | O                | -4.4139122      | -1.0564122 | 0.9486872  |
| C  | 3.6763104  | -0.8973573 | -1.8178186 | H                | 3.8671289       | -0.0284436 | -5.1849823 |
| H  | 1.8861170  | 0.2540843  | -1.4788699 | H                | 3.7962552       | -1.6571203 | -4.5040272 |
| C  | 1.0870417  | -4.2243599 | 0.1686686  | H                | 3.2972099       | -6.7679193 | 1.0680299  |
| C  | 3.4020398  | -3.3140537 | 0.5849970  | H                | 2.6188079       | -5.5230508 | 2.1209511  |
| H  | 2.4651249  | -3.5243231 | -1.3210981 | H                | -0.1373768      | 3.8597183  | 3.3034416  |
| C  | -0.9394630 | -0.0042201 | 2.2690889  | H                | -1.2044916      | 3.3590459  | 1.9800433  |
| H  | 0.8860815  | 1.2347900  | 0.4589868  | H                | 0.5317021       | 2.9985586  | 1.8934768  |
| W  | -2.2746874 | 0.1768447  | -1.0938567 | H                | 0.8805537       | 2.0434913  | 5.3213729  |
| C  | 1.9912956  | -0.5053411 | -4.1984124 | H                | 0.4997910       | 0.3160125  | 5.3891457  |
| H  | 0.3832646  | -1.1415839 | -2.9034851 | H                | 1.6882735       | 0.9195751  | 4.2210470  |
| H  | 1.6523482  | -2.3408798 | -3.1126199 | H                | -2.1833488      | 2.6032170  | 5.0491721  |
| C  | 4.1903561  | -0.1214944 | -3.0352931 | H                | -3.0980779      | 1.8631116  | 3.7276356  |
| H  | 3.9605433  | -1.9536917 | -1.9325336 | H                | -2.5257853      | 0.8653486  | 5.0753013  |
| H  | 4.1737805  | -0.5319882 | -0.9136073 | H                | -1.3953526      | -2.9353975 | 0.9221127  |
| C  | 1.6373530  | -5.6559201 | 0.2023204  | H                | -2.7913629      | -2.8596378 | 2.0136851  |
| H  | 0.1995058  | -4.1789857 | -0.4718061 | H                | -1.4886219      | -4.0184108 | 2.3204732  |
| H  | 0.7590014  | -3.9430824 | 1.1753870  | H                | 0.8734936       | -3.2933502 | 3.9172923  |
| C  | 3.9570932  | -4.7448909 | 0.6165398  | H                | 1.5632036       | -2.2699207 | 2.6427399  |
| H  | 4.1787490  | -2.6236638 | 0.2401277  | H                | 1.3367097       | -1.6206186 | 4.2720202  |
| H  | 3.1459545  | -3.0076612 | 1.6070198  | H                | -2.8690887      | -1.4180271 | 4.5203984  |
| Si | -0.6510225 | 1.4541261  | 3.4684995  | H                | -1.3922197      | -1.1089963 | 5.4548204  |
| Si | -0.8427257 | -1.7338369 | 3.0599145  | H                | -1.8588070      | -2.7683950 | 5.0576561  |
| H  | -2.0247641 | 0.0737601  | 2.1026239  | C                | 2.6234670       | 5.2021739  | -0.0256809 |
| N  | 2.0366448  | 2.2491472  | 0.2947701  | C                | 2.5499961       | 3.3989783  | -2.4484840 |
| C  | -1.1569261 | 1.0520656  | -2.5906216 | C                | 0.0008606       | 4.0424579  | -0.9426858 |
| C  | -3.8176954 | 0.2570852  | -2.3946169 | C                | 3.5651751       | 3.0756573  | 2.7749529  |
| C  | -1.8098563 | -1.7396599 | -1.6793923 | C                | 3.3440969       | 0.1743805  | 1.9230277  |
| C  | -2.8054096 | 1.9904288  | -0.2924188 | C                | 5.0660558       | 2.1280812  | 0.3429061  |
| C  | -3.5916279 | -0.6339792 | 0.2442264  | H                | 3.7125857       | 5.1105294  | 0.0735179  |
| C  | 3.5152453  | -0.6086388 | -4.3220799 | H                | 2.2201768       | 5.4484406  | 0.9645869  |
| H  | 1.5055041  | -0.8897706 | -5.1052224 | H                | 2.4216921       | 6.0522525  | -0.6928092 |
| H  | 1.7104944  | 0.5510371  | -4.1101658 | H                | 2.3927903       | 4.2997942  | -3.0581466 |
| H  | 3.9777877  | 0.9454541  | -2.8970513 | H                | 2.0826567       | 2.5560456  | -2.9700589 |
| H  | 5.2809075  | -0.2269355 | -3.1120452 | H                | 3.6292547       | 3.2053145  | -2.4048507 |
| C  | 2.8924876  | -5.7475103 | 1.0794677  | H                | -0.5889573      | 3.1656214  | -1.2250428 |
| H  | 1.8900790  | -5.9710032 | -0.8212528 | H                | -0.1208598      | 4.7938677  | -1.7341522 |
| H  | 0.8679490  | -6.3491603 | 0.5678463  | H                | -0.4360261      | 4.4461756  | -0.0228983 |
| H  | 4.2961535  | -5.0190947 | -0.3934828 | H                | 2.6472793       | 3.0761090  | 3.3734552  |
| H  | 4.8359688  | -4.7924237 | 1.2732845  | H                | 3.7603100       | 4.1118544  | 2.4728002  |
| C  | -0.3289406 | 3.0657309  | 2.5692753  | H                | 4.3911836       | 2.7544811  | 3.4252424  |
| C  | 0.7360425  | 1.1431573  | 4.7103939  | H                | 3.4967205       | -0.5598516 | 1.1249987  |
| C  | -2.2649813 | 1.7042793  | 4.4242353  | H                | 2.3750783       | -0.0494941 | 2.3797687  |
| C  | -1.7064035 | -3.0029359 | 1.9658733  | H                | 4.1191589       | 0.0005142  | 2.6806455  |
| C  | 0.9012354  | -2.2745010 | 3.5093783  | H                | 5.1012856       | 1.5075886  | -0.5597792 |
| C  | -1.8325690 | -1.7390219 | 4.6748261  | H                | 5.2304029       | 3.1682381  | 0.0326957  |
| Si | 1.8272516  | 3.6074751  | -0.7033576 | H                | 5.9081042       | 1.8374491  | 0.9869583  |
| Si | 3.4018568  | 1.9426371  | 1.2508284  |                  |                 |            |            |
| O  | -0.6371592 | 1.5550340  | -3.4952239 | <b>TSS6</b> .xyz |                 |            |            |
| O  | -4.7024483 | 0.3007804  | -3.1474166 | 79               |                 |            |            |
| O  | -1.5880053 | -2.8399402 | -1.9624419 | Energy =         | -2593.079584961 |            |            |
| O  | -3.1851615 | 2.9704436  | 0.1990517  | B                | -2.4121253      | 0.2130371  | -0.1031821 |

|    |            |            |            |   |            |            |            |
|----|------------|------------|------------|---|------------|------------|------------|
| O  | -1.3964710 | -0.7085930 | -0.0468171 | H | -1.3232127 | -2.3273631 | -2.8174692 |
| P  | 0.2061412  | -0.6637558 | -0.6460743 | H | -1.7750839 | -4.8028272 | 0.2553406  |
| C  | 0.4023542  | 0.1395724  | -3.3460895 | H | -1.1214849 | -3.9649526 | -3.4637555 |
| O  | -0.5061648 | -0.3943116 | -3.8855688 | H | -2.5691547 | -3.2236431 | 0.4052104  |
| O  | 1.3597992  | 0.8135318  | -3.1812465 | H | -1.3038145 | -1.1024638 | 2.4372182  |
| Si | -0.2689181 | -3.1182239 | 1.3714455  | H | -1.1072292 | 1.7516629  | -0.9408480 |
| Si | 0.5614862  | -3.5067541 | -1.6976788 | H | -2.3930467 | 2.9348795  | 0.8672638  |
| W  | 1.8193005  | 0.9579130  | 0.6694636  | H | -3.6360973 | -1.3616770 | 0.7814075  |
| O  | 1.2406243  | 3.4498172  | -1.2817799 | H | -1.1194276 | -2.4485967 | 3.5775784  |
| O  | -0.7265146 | 1.6459074  | 2.4958152  | H | -1.3599117 | 4.2796653  | -0.9369353 |
| O  | 3.8092052  | 2.9109329  | 2.1892581  | H | -3.1052731 | 0.2500247  | 2.6063857  |
| O  | 4.0167991  | -0.1398737 | -1.4020062 | H | 0.2735838  | -1.4388722 | 3.1673544  |
| O  | 2.8876693  | -1.3195571 | 2.6588132  | H | -4.8956499 | -0.6049688 | -1.2455893 |
| C  | -1.9088658 | -3.9349797 | 0.9105097  | H | 0.1040824  | -5.7887033 | -0.7029043 |
| C  | -1.1141466 | -3.3650311 | -2.5443113 | H | -5.0381690 | -1.2804457 | 2.8841689  |
| C  | 1.3957070  | 2.5224387  | -0.6016276 | H | -2.8918983 | 5.0029719  | -0.4406498 |
| C  | 0.2128916  | 1.4143406  | 1.8534434  | H | -6.1259446 | -1.7960647 | 0.5488311  |
| C  | -0.6315110 | -1.8979566 | 2.7613633  | H | -2.3683580 | 0.6393562  | -2.8106755 |
| C  | -2.1956698 | 1.5986332  | -0.8464970 | H | 0.9035206  | -5.8972931 | -2.2785414 |
| C  | -3.7606226 | -0.2837106 | 0.5909337  | H | -1.3044687 | 2.8644256  | -3.1702592 |
| C  | -2.7754294 | 2.8513117  | -0.1557522 | H | 1.9702614  | -1.8972503 | -3.0236427 |
| C  | 0.6359108  | -2.4214382 | -0.1455299 | H | 1.6963334  | -2.3938800 | 0.1454875  |
| C  | -2.4477782 | 4.1308259  | -0.9388715 | H | -4.1349966 | 1.4559697  | 1.8485077  |
| C  | -3.9919886 | 0.3748340  | 1.9756181  | H | 1.8528548  | -3.4672268 | -3.8409764 |
| C  | -5.0339621 | -0.1230684 | -0.2694142 | H | 0.3686214  | -4.8856449 | 3.0132428  |
| C  | 0.8797547  | -5.3395557 | -1.3326346 | H | -5.2110013 | 0.9434904  | -0.4674463 |
| C  | -2.7529114 | 1.5241160  | -2.2946107 | H | -5.3747204 | 0.2756555  | 3.6495475  |
| C  | -5.2215756 | -0.2154915 | 2.6793995  | H | -3.8459226 | 1.4245400  | -2.2541918 |
| C  | 1.9508911  | -2.9790693 | -2.8631988 | H | 1.0837217  | -5.2528858 | 1.4339617  |
| C  | 3.0820943  | 2.1951082  | 1.6161711  | H | -2.6468996 | 4.9465349  | -2.9446232 |
| C  | -6.2674757 | -0.7117120 | 0.4299837  | H | 1.8460316  | -5.4887998 | -0.8361173 |
| C  | 0.8522137  | -4.4426543 | 2.1324463  | H | -7.1611962 | -0.5722490 | -0.1927266 |
| C  | -2.9394053 | 4.0453301  | -2.3902805 | H | 1.7997092  | -3.9989605 | 2.4614314  |
| C  | 3.2299654  | 0.2796487  | -0.6588389 | H | 2.9238731  | -3.2623018 | -2.4415871 |
| C  | -2.3977944 | 2.7897722  | -3.0868268 | H | -4.0393163 | 4.0094752  | -2.3960569 |
| C  | 2.4491671  | -0.5161767 | 1.9411075  | H | -7.3425342 | -0.5359123 | 2.3129535  |
| C  | -6.4795049 | -0.0788368 | 1.8116146  | H | -2.7949551 | 2.7206814  | -4.1082691 |
| H  | -2.4149051 | -4.2802405 | 1.8214994  | H | -6.7126854 | 0.9888700  | 1.6847555  |
| H  | -1.9210315 | -3.7246822 | -1.8981014 | H | -3.8675003 | 2.7482091  | -0.0778016 |
